1  
2 **A distributed network of noise-resistant neurons**  
3 **in the central auditory system**  
4  
5  
6  
7

8 Souffi S.<sup>1,2</sup>, Lorenzi C.<sup>3</sup>, Huetz C.<sup>1,2</sup>, Edeline J.-M.\*<sup>1,2</sup>  
9

10  
11 <sup>1</sup> Paris-Saclay Institute of Neurosciences (Neuro-PSI), Department Cognition and Behavior

12 <sup>1</sup> CNRS UMR 9197,

13 <sup>2</sup> Université Paris-Sud, Bâtiment 446, 91405 Orsay cedex, France

14 <sup>3</sup> Laboratoire des systèmes perceptifs, UMR CNRS 8248, Département d'Etudes Cognitives, Ecole  
15 normale supérieure, Université Paris Sciences & Lettres, Paris, France.  
16

17  
18  
19 Number of pages: 35

20 Number of Figures: 7

21 Number of Supplementary figures: 2

22 Number of Tables: 2

23 Number of words in Abstract: 150  
24

25 Running title: *Noise-resistant neurons in the central auditory system*  
26

27 Keywords: auditory system; masking noise; typology of neuronal behaviors; in vivo electrophysiology.  
28  
29  
30

31 \* *Corresponding Author:*

32 Jean-Marc Edeline

33 Paris-Saclay Institute of Neuroscience (Neuro-PSI)

34 UMR CNRS 9197 Université Paris-Sud, Bâtiment 446,

35 91405 Orsay cedex, France

36 email: jean-marc.edeline@u-psud.fr  
37  
38

39  
40  
41  
42  
43  
44  
45  
46  
47  
48  
49  
50  
51  
52  
53  
54  
55

## Abstract

Background noise strongly penalizes auditory perception of speech in humans or vocalizations in animals. Despite this, auditory neurons successfully detect and discriminate behaviorally salient sounds even when the signal-to-noise ratio is quite poor. Here, we collected neuronal recordings in cochlear nucleus, inferior colliculus, auditory thalamus, primary and secondary auditory cortex in response to vocalizations presented either against a stationary or a chorus noise. Using a clustering approach, we provide evidence that five behaviors exist at each level of the auditory system from neurons with high fidelity representations of the target, named target-specific neurons, mostly found in inferior colliculus and thalamus, to neurons with high fidelity representations of the noise, named masker-specific neurons mostly found in cochlear nucleus in stationary noise but in similar proportions in each structure in chorus noise. This indicates that the neural bases of auditory perception in noise rely on a distributed network along the auditory system.

## Introduction

56  
57  
58 In natural conditions, speech (in humans) and communication sounds (in animals) usually co-occur  
59 with many other competing acoustic signals. Both humans and animals exhibit remarkable abilities to  
60 reliably detect, process and discriminate communication sounds even when the signal-to-noise ratio  
61 (SNR) is quite low (Cherry, 1953; Gerhardt and Klump, 1988; Hulse et al., 1997). The auditory sys-  
62 tem has developed strategies to extract these behaviorally important signals mixed up with substantial  
63 amounts of noise. Over the last decade, many studies performed on different species have reported  
64 that the responses of auditory cortex neurons are quite resistant to various types of noises, even at low  
65 SNR (Narayan et al., 2007; Schneider and Woolley, 2013; Rabinowitz et al., 2013, Mesgarani et al.,  
66 2014; Ni et al., 2017; Beetz et al., 2018). Several hypotheses have been formulated to account for the  
67 high performance of auditory cortex neurons. For example, it was proposed that noise tolerance is  
68 correlated with adaptation to the stimulus statistics, which is more pronounced at the cortical than at  
69 the subcortical level (Rabinowitz et al., 2013). A dynamic model of synaptic depression combined  
70 with feedback gain normalization was also suggested as a potential mechanism for robust speech rep-  
71 resentation in the auditory cortex (Mesgarani et al., 2014). Alternatively, a simple feedforward inhibi-  
72 tion circuit operating in a sparse coding scheme was viewed as a mechanism to explain background-  
73 invariant responses detected for a population of neurons in the secondary auditory cortex (Schneider  
74 and Woolley, 2013).

75 A recent study (Ni et al., 2017) reported that auditory cortex neurons can be assigned to categories  
76 depending upon their robustness to noise. More precisely, by testing the responses to conspecific vo-  
77 calizations at different SNRs, this study described four types of responses classes (robust, balanced,  
78 insensitive and brittle) in the marmoset primary auditory cortex, and pointed out that depending upon  
79 the background noise, the same neuron can exhibit different response classes (Ni et al., 2017). The  
80 aim of the present study was to determine whether the subcortical auditory structures display similar  
81 proportions of these four types of response classes and whether the noise-type sensitivity is present at  
82 the subcortical level. We used exactly the same methodology as in Ni and colleagues (2017) to assign  
83 the neurons to a given response class: the Extraction Index (EI, initially defined by Schneider and  
84 Woolley, 2013) was computed at three SNRs (+10, 0 and -10 dB) and an unsupervised clustering ap-  
85 proach (the K-means algorithm) was used to reveal groups of EI profiles. Based on this clustering  
86 approach performed on the whole auditory system, we define a typology of neuronal behaviors in  
87 noise based on five categories found at each stage, from target-ultraspecific and target-specific neu-  
88 rons showing a high fidelity representation of the target, to masker-specific neurons showing a high-  
89 fidelity representation of the noise, with two intermediary neuronal categories, one showing no prefer-  
90 ence either for the target or for the noise named non-specific neurons, and the other characterized by a  
91 sensitivity to the SNR named SNR dependent neurons.

92 Here, we present evidence demonstrating that the target-specific neurons are in higher proportions in  
93 inferior colliculus and thalamus in both noises, whereas the masker-specific neurons are found mostly  
94 in the cochlear nucleus in stationary noise but in similar proportions in each structure in a noise com-  
95 posed of a mixture of conspecific vocalizations that we will name “chorus noise”. We also provide  
96 evidence that the noise-type sensitivity - that is the ability to switch category from a given background  
97 noise to another - although present at each level of the auditory system in small proportions, is mostly  
98 detected in the inferior colliculus and the thalamus.  
99

100

## Results

101 From a database of 2334 multi-unit recordings collected in the five investigated auditory structures,  
 102 several criteria were used to include each neuronal recording in our analyses (see Table 1). A record-  
 103 ing had to show significant responses to pure tones (see Methods section) and an evoked firing rate  
 104 significantly above spontaneous firing rate (200 ms before each original vocalization) for at least one  
 105 of the four original vocalizations (Fig. 1A illustrates their temporal envelopes and spectrograms). The-  
 106 se four vocalizations were presented in quiet and embedded either in a vocalization-shaped stationary  
 107 noise (Fig. 1B) or in a chorus noise (Fig. 1C) using three SNRs. We selected neurons showing re-  
 108 sponses at the three SNRs both in stationary and chorus noise in order to derive systematically six EI  
 109 values for each neuronal recording. To determine a significance level of the EI value, we computed an  
 110  $EI_{\text{Surrogate}}$  value for each recording (see Methods section) and included only the recordings with at least  
 111 one of the six EI values significantly higher than the  $EI_{\text{Surrogate}}$ . Applying these criteria, we selected a  
 112 total of 1267 recordings (Table 1): 389 neurons in the cochlear nucleus (CN), 339 neurons in the cen-  
 113 tral nucleus of the inferior colliculus (CNIC), 198 neurons in auditory thalamus (MGv), 261 neurons  
 114 in the primary auditory cortex (A1) and 80 neurons in a secondary auditory cortical area (VRB).

|                                                                                | CN  | Lemniscal pathway |     |     | Non-<br>lemniscal<br>pathway | Total |
|--------------------------------------------------------------------------------|-----|-------------------|-----|-----|------------------------------|-------|
|                                                                                |     | CNIC              | MGv | A1  | VRB                          |       |
| Number of animals                                                              | 10  | 11                | 10  | 11  | 5                            | 47    |
| Number of recordings tested                                                    | 672 | 478               | 448 | 544 | 192                          | 2334  |
| TFRP only                                                                      | 560 | 421               | 285 | 455 | 126                          | 1847  |
| TFRP and significant response to at least one vocalization                     | 499 | 386               | 262 | 354 | 95                           | 1596  |
| Six EI values (for the six SNRs)                                               | 488 | 368               | 224 | 320 | 95                           | 1495  |
| One of the six EI values significantly higher than the $EI_{\text{Surrogate}}$ | 389 | 339               | 198 | 261 | 80                           | 1267  |

115

116 **Table 1.** Summary of the number of animals and number of selected recordings in each structure

117

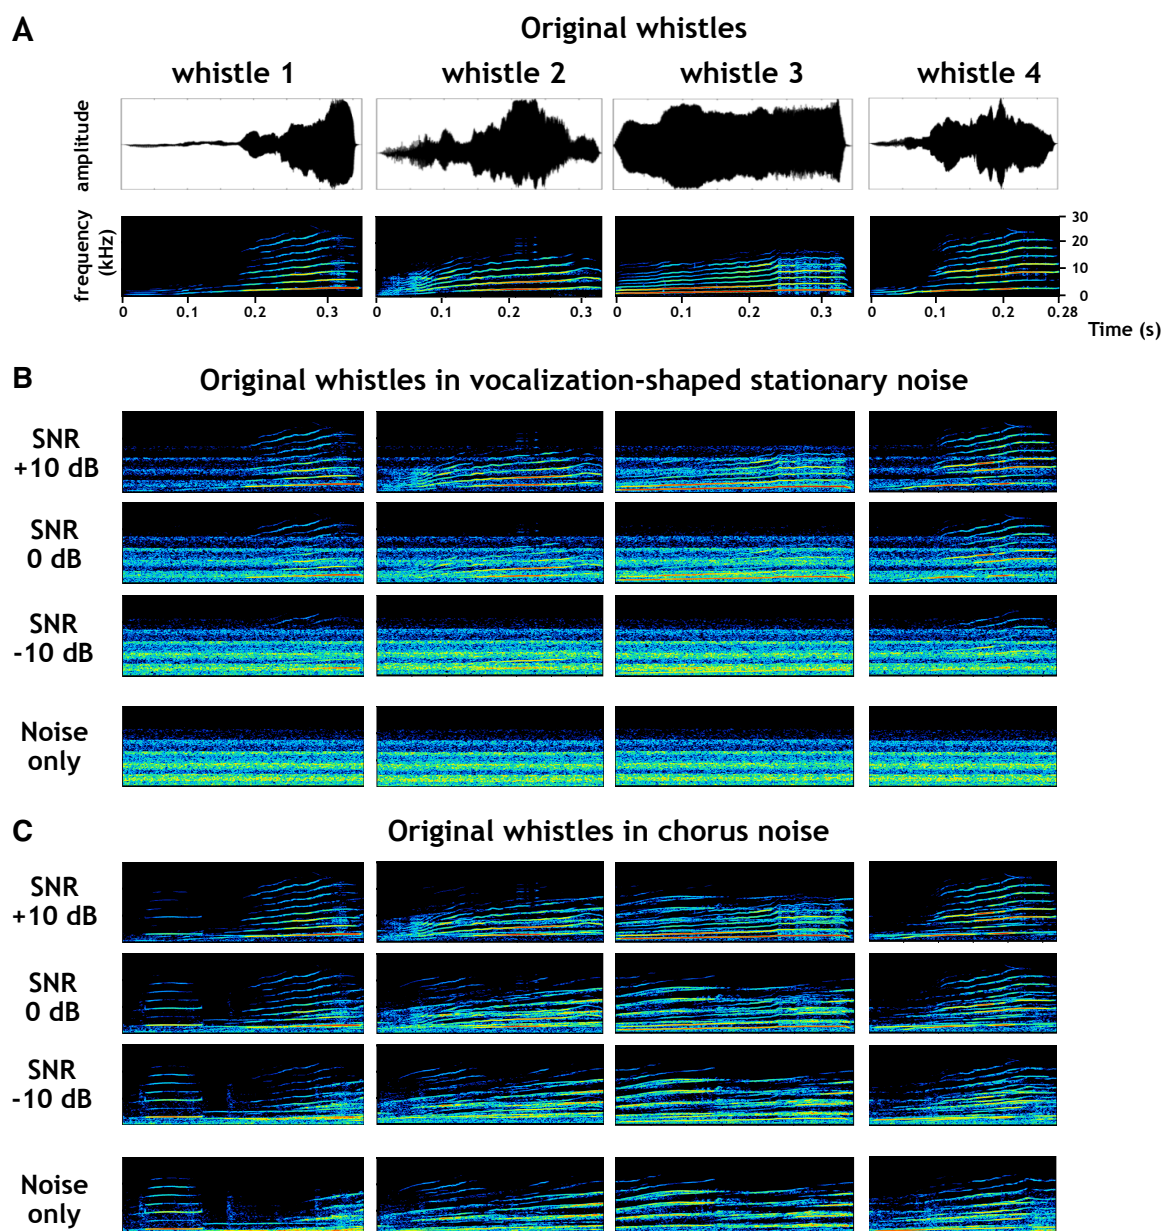

118

119 **Figure 1.** Original and noisy vocalizations. **A.** Waveforms (*top*) and spectrograms (*bottom*) of the four original  
120 whistles used in this study. **B-C.** Spectrograms of the four whistles in stationary (B) and chorus (C) noise at  
121 three SNRs (+10, 0 and -10 dB SPL, *from top to bottom*) and the noise only.

122

123 **Chorus noise impacted neuronal responses more than stationary noise at each stage of the audi-**  
124 **itory system**

125

126 Figure 2A shows rasters for recordings collected in the five auditory structures in response to the origi-  
127 nal (in quiet) and masked vocalizations embedded in stationary and chorus noise. In all structures, the  
128 neuronal responses evoked by the four whistles progressively vanished as the SNR decreased from  
129 +10 to -10 dB. However, one can clearly detect that recordings obtained in CNIC and MGv still dis-  
130 play clearly detectable responses at 0 dB SNR, even down to -10 dB for some vocalizations in CNIC.

131 Quantification of the evoked firing rate and the response trial-to-trial temporal reliability in stationary  
132 and chorus noise confirmed these observations (Fig. 2B-E). In both noises, the lower the SNR, the  
133 lower the evoked firing rate and the trial-to-trial reliability. More precisely, in both noises, the de-  
134 crease in evoked firing rate was significant as early as the +10 dB SNR in all auditory structures ex-  
135 cept in VRB for which the decrease was significant at 0 dB SNR (Fig. 2B-2D; for the stationary noise  
136 (Fig. 2B): one-way ANOVA:  $F_{CN(4,1944)}=315$ ;  $F_{CNIC(4,1694)}=265.5$ ;  $F_{MGv(4,989)}=174.9$ ;  $F_{A1(4,1304)}=95.8$ ;  
137  $F_{VRB(4,399)}=40.8$ ,  $p<0.001$ ; with post-hoc paired t tests,  $p<0.001$ ; for the chorus noise (Fig. 2D): one-  
138 way ANOVA:  $F_{CN(4,1944)}=108.7$ ;  $F_{CNIC(4,1694)}=92.7$ ;  $F_{MGv(4,989)}=93.8$ ;  $F_{A1(4,1304)}=74.7$ ;  $F_{VRB(4,399)}=24.2$ ,  
139  $p<0.001$ ; with post-hoc paired t tests,  $p<0.001$ ). Similarly, in both noises, the trial-to-trial temporal  
140 reliability (quantified by the CorrCoef index) was significantly decreased as early as the +10 dB SNR  
141 in CN, MGv and A1 whereas in CNIC and VRB, the decrease was significant only at the 0 dB SNR  
142 (Fig. 2C-2E; for the stationary noise (Fig. 2C): one-way ANOVA:  $F_{CN(4,1914)}=458.7$ ;  
143  $F_{CNIC(4,1559)}=317.1$ ;  $F_{MGv(4,831)}=226.6$ ;  $F_{A1(4,1101)}=115.8$ ;  $F_{VRB(4,357)}=45.3$ ,  $p<0.001$ ; with post-hoc paired  
144 t tests,  $p<0.001$ ; for the chorus noise (Fig. 2E): one-way ANOVA:  $F_{CN(4,1916)}=58.9$ ;  $F_{CNIC(4,1614)}=16.6$ ;  
145  $F_{MGv(4,929)}=28.4$ ;  $F_{A1(4,1096)}=18.8$ ;  $F_{VRB(4,365)}=6.5$ ,  $p<0.001$ ; with post-hoc paired t tests,  $p<0.001$ ). Note  
146 that, on average, collicular and thalamic neurons showed higher temporal reliability than cochlear  
147 nucleus and cortical neurons both in quiet and in noise conditions (Fig. 2C-2E). Thus, in all structures,  
148 the two types of background noise decreased the firing rate and temporal reliability of neuronal re-  
149 sponses. Even if the noise-induced changes for these two parameters were larger in subcortical struc-  
150 tures compared to auditory cortex, the highest values remained in the inferior colliculus and thalamus.  
151 Neuronal responses were further investigated by quantifying the Extraction Index (EI, see Methods  
152 section; Schneider and Woolley, 2013; Ni et al., 2017) on our entire database, i.e. the 1267 recordings  
153 obtained in the five structures. For each neuron, this index compares the PSTH obtained at a given  
154 SNR with the PSTHs obtained with the original vocalizations and with the noise alone: the higher the  
155 EI value (close to 1), the more the responses are target-like. Conversely, the lower the EI value (close  
156 to -1), the more the responses are masker-like.

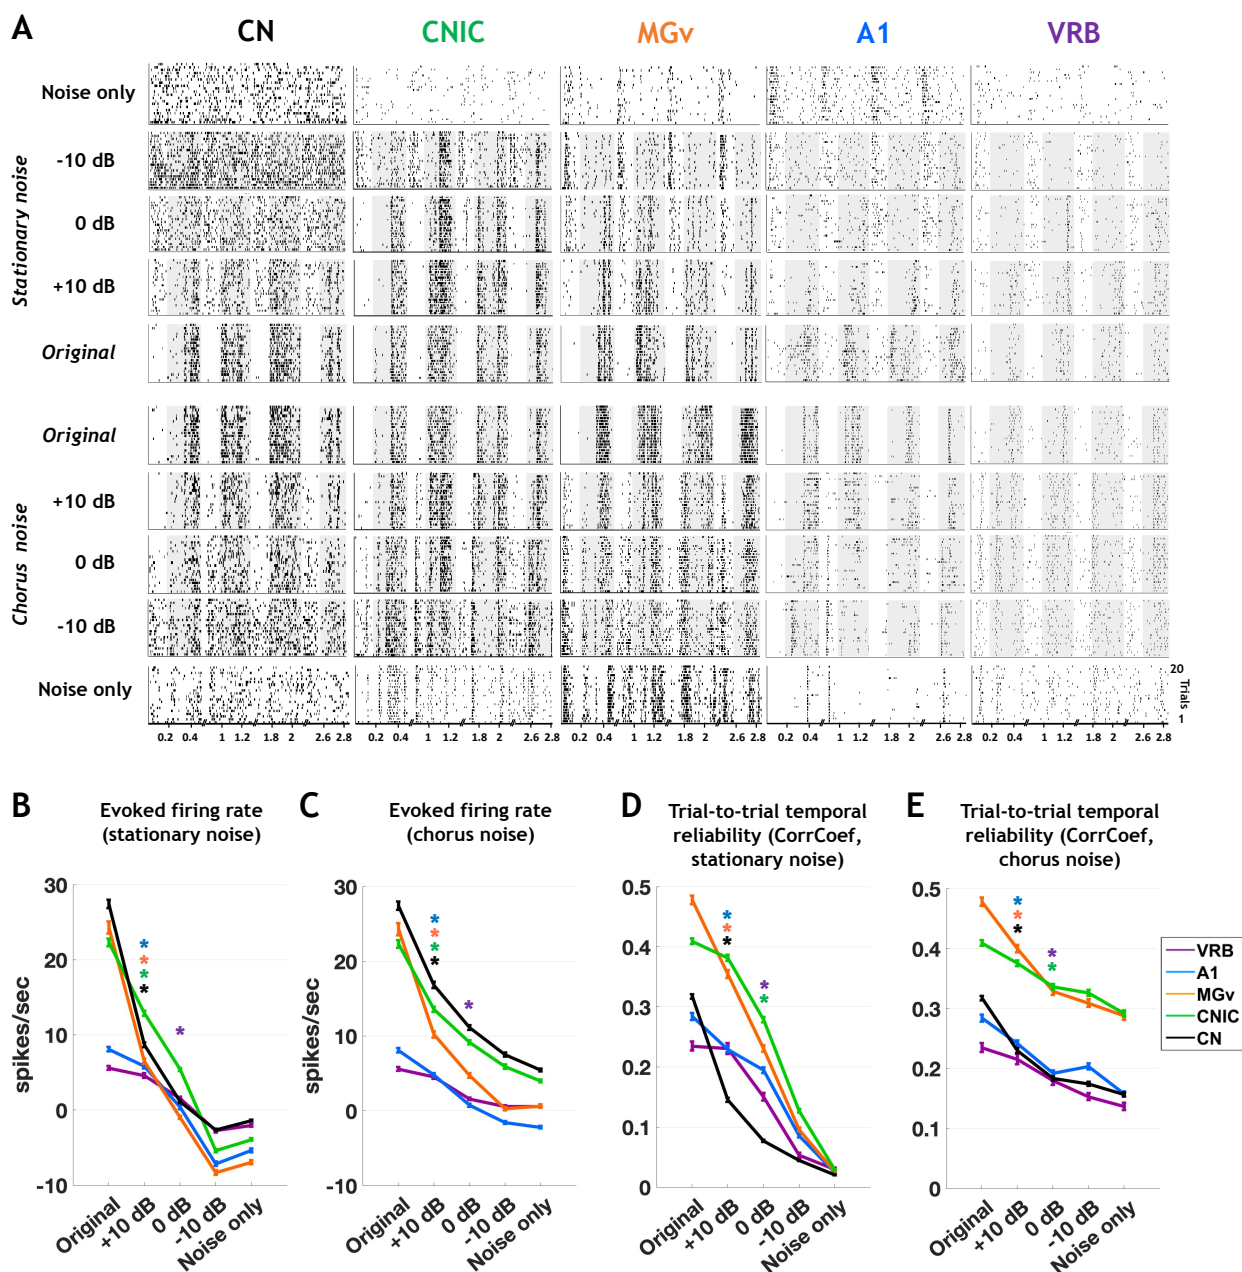

157

158 **Figure 2.** Noise strongly reduces the evoked firing rate and the temporal reliability but to a lesser extent for  
 159 CNIC and MGv neurons. **A.** Raster plots of responses of the four original vocalizations, noisy vocalizations and  
 160 noise alone in both noises recorded in CN, CNIC, MGv, A1 and VRB. The grey part of rasters corresponds to  
 161 the evoked activity. **B-E.** The mean values ( $\pm$ SEM) represent the evoked firing rate (spikes/sec) (B, C) and the  
 162 trial-to-trial temporal reliability represented by the CorrCoef value (D, E) obtained with original conditions,  
 163 noisy vocalizations and noise alone in stationary and in chorus noise at three SNRs (+10, 0 and -10 dB SPL) in  
 164 CN (in black), CNIC (in green), MGv (in orange), A1 (in blue) and VRB (in purple) (one-way ANOVA,  $P <$   
 165 0.05; with post-hoc paired t tests,  $*P <$ 0.05). The evoked firing rate corresponds to the total number of action  
 166 potentials occurring during the presentation of the stimulus minus the spontaneous activity (200 ms before each  
 167 acoustic stimulus).

168

169

170 We found that the mean EI values were higher in the inferior colliculus and thalamus than in the coch-  
 171 lear nucleus and cortex, except in chorus noise at -10 dB SNR, which strongly impacted all neuronal  
 172 responses at each stage (Fig. 3). Figure 3A displays examples of rasters illustrating a case of  $EI > 0$



173 (left panel) and a case of  $EI < 0$  (right panel). Figure 3 also presents the EI values in chorus noise as a  
174 function of EI values in stationary noise at the +10, 0 and -10 dB SNR for all the recordings (Fig. 3B-  
175 D). The increase in the number of dots in the bottom left quadrant indicates that for most of the neu-  
176 rons, the EI decreased from +10 dB to 0 dB SNR, an effect which is further accentuated at -10 dB  
177 SNR. In addition, more pronounced effects of the chorus noise were observed as early as the 0 dB  
178 SNR in each auditory structure as indicated by the large number of dots below the diagonal lines. Ex-  
179 amination of these scattergrams also indicates that the EI value distributions differed between struc-  
180 tures (represented by a color code). Statistical analyses revealed that on average, EI values decreased  
181 when the SNR decreased in all structures and for both types of noises (for the stationary noise (Fig.  
182 3E): one-way ANOVA:  $F_{CN(2,1166)}=171.1$ ;  $F_{CNIC(2,1016)}=176.3$ ;  $F_{MGv(2,593)}=77.6$ ;  $F_{A1(2,782)}=37.6$ ;  
183  $F_{VRB(2,239)}=14.3$ ,  $p<0.001$ ; with post-hoc paired t tests,  $p<0.001$ ; for the chorus noise (Fig. 3F): one-  
184 way ANOVA:  $F_{CN(2,1166)}=394.4$ ;  $F_{CNIC(2,1016)}=361.0$ ;  $F_{MGv(2,593)}=275.3$ ;  $F_{A1(2,782)}=104.5$   $F_{VRB(2,239)}=47.6$ ,  
185  $p<0.001$ ; with post-hoc paired t tests,  $p<0.001$ ).

186 Thus, in all structures, both noises alter the evoked responses promoting masker-like responses, and  
187 the chorus noise promoted a higher number of masker-like responses than the stationary noise.

188 We next aimed at characterizing categories of neurons that display a particular behavior in noise in  
189 relation to fidelity of neural representation either of the target or of the noise. Therefore, a clustering  
190 analysis was performed on the entire database, i.e. the 1267 recordings obtained in the five structures,  
191 separately for the stationary and for the chorus noise.

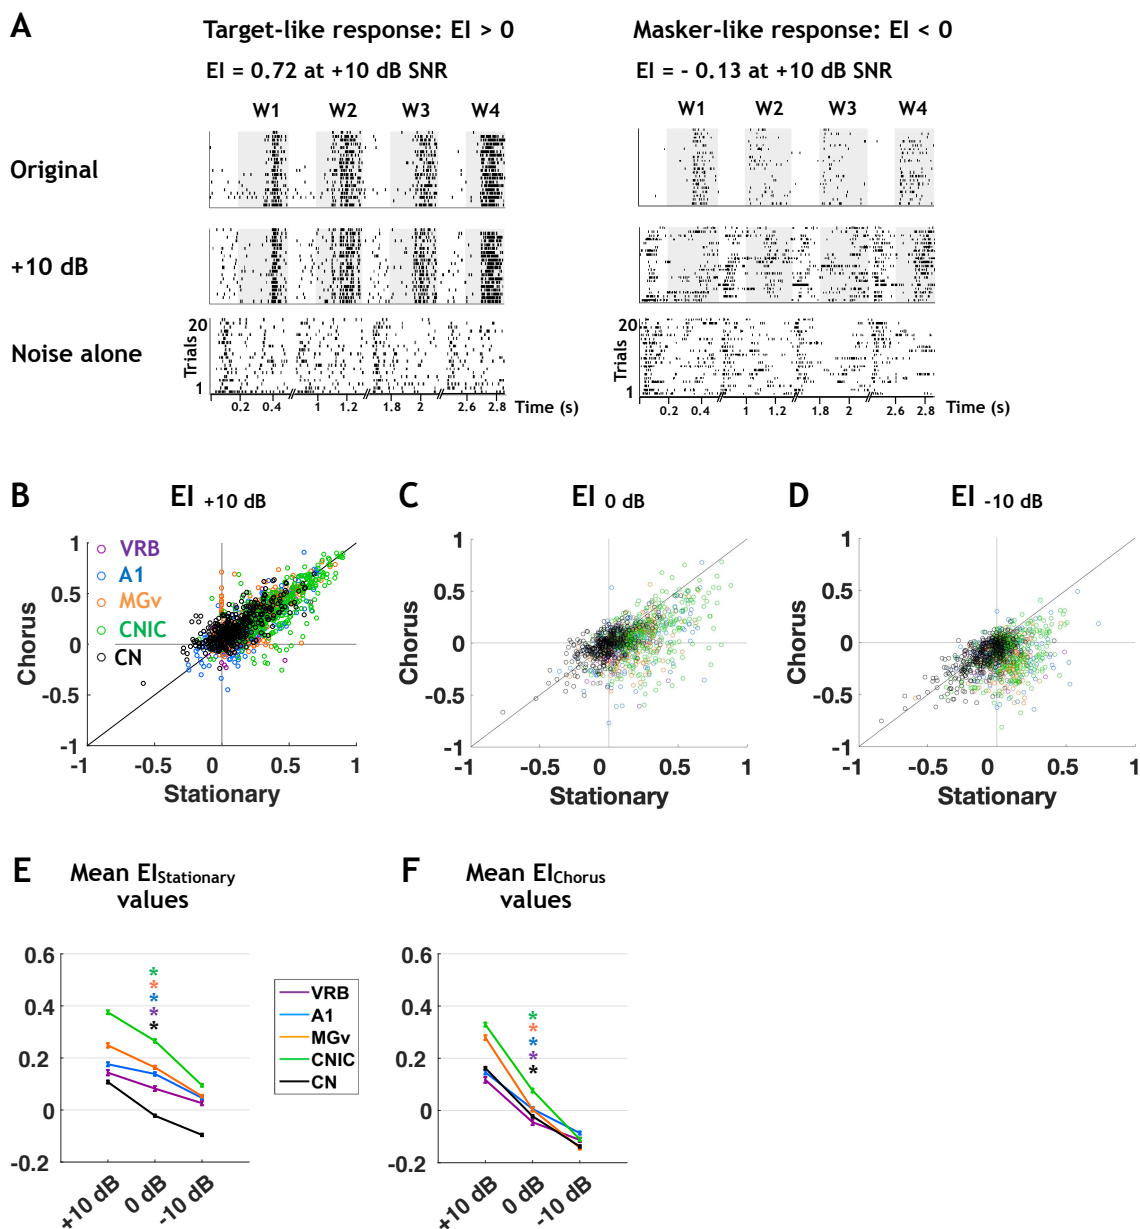

192

193 **Figure 3.** The decrease of EI values in each auditory structure is more pronounced in chorus noise than in sta-  
 194 tionary noise. **A.** Examples of neuronal responses in stationary noise with values of EI > 0 corresponding to a  
 195 vocalization-like response (left) and EI < 0 corresponding to a noise-like response (right). Top panels shows the  
 196 responses to the original vocalizations, the middle panels the responses to vocalizations at the +10 dB SNR and  
 197 the bottom panels the responses to stationary noise alone. **B-F.** Scattergrams showing the SNR effect on EI  
 198 values in chorus noise as a function of EI values in stationary noise at +10, 0 and -10 dB SNR (B-D) and mean  
 199 EI values ( $\pm$ SEM) for the three SNRs (E-F) obtained in CN (in black), CNIC (in green), MGv (in orange), A1  
 200 (in blue) and VRB (in purple) in stationary (E) and chorus noise (F).

201

202 **Five distinct groups of neurons exist at each stage of the auditory system but in different pro-**  
 203 **portions**

204

205 We initially aimed at determining whether the four categories of cortical neurons (robust, balanced,  
 206 insensitive and brittle) described by Ni and colleagues (2017) across several SNRs can also be found  
 207 at each stage of the auditory system. Analyzing our whole database with the same clustering method

208 and the same criteria (elbow method) as in Ni and colleagues (2017) led us to consider either five or  
209 six clusters (Fig. 4A) in both noises. When six clusters were defined, two of them displayed very simi-  
210 lar behaviors with only slight differences in EI values in each noise type (see Fig. 4B-C), which urged  
211 us to consider only five clusters. Compared to the four categories of Ni and colleagues (2017), we  
212 added one new category which represents an attenuated version of their robust neurons. These neurons  
213 represent in fact a large proportion of our database (25% and 18% in the stationary and chorus noise)  
214 and cannot be neglected.

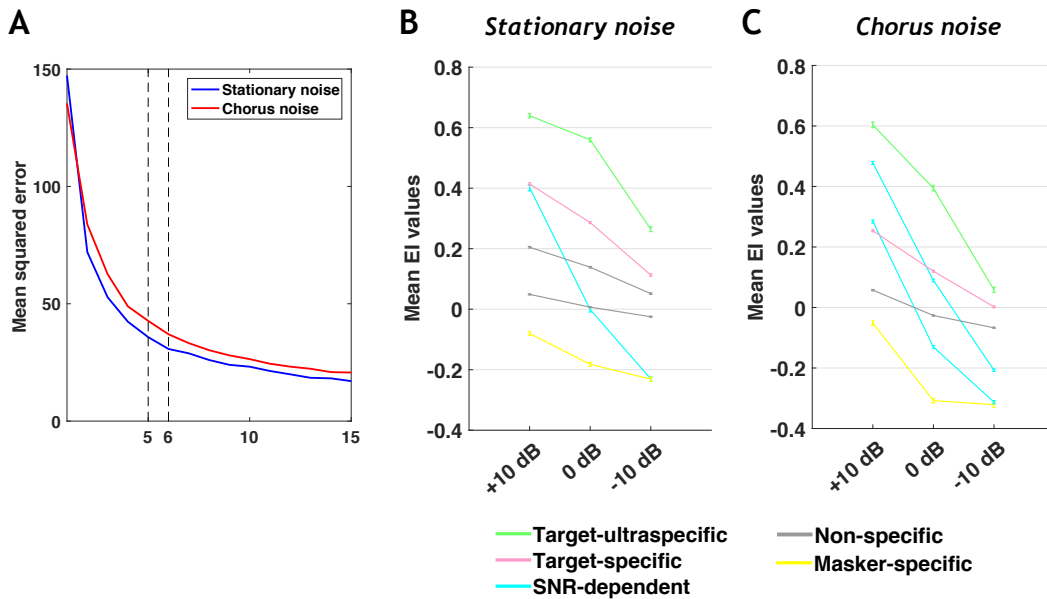

215  
216 **Figure 4.** The choice of five clusters is optimal to reveal the different behaviors in both noises.  
217 **A.** Mean square error of EI profile clustering as a function of the number of clusters using the K-means algo-  
218 rithm for the stationary and chorus noise. **B-C.** Population average EI profile ( $\pm$ SEM) of each cluster when  
219 considering six clusters to separate the data in the stationary noise (B) and in the chorus noise (C). Note that in  
220 both noises, two clusters have equivalent mean EI profile (i.e. the same EI evolution across the three SNRs) and  
221 this led us to consider only five clusters in the results section (Figure 5).

222  
223 We also opted for cluster names using more symmetric terms. The neurons keeping a high-fidelity  
224 representation of the vocalizations despite the presence of noise will be called the target-ultraspecific  
225 or target-specific neurons, those keeping a high-fidelity representation of the noise across the SNRs  
226 will be called masker-specific neurons and those showing no preference will be called non-specific  
227 neurons. One last category of neurons is characterized by sensitivity to the signal-to-noise ratio and  
228 therefore will be called SNR-dependent. This change in cluster names gives an equivalent role to tar-  
229 get-specific and noise-sensitive neurons, named here masker-specific neurons, since in some ethologi-  
230 cal conditions they could play a functional role as important as the target-specific neurons.

231 Figure 5 presents the five clusters derived from the whole data set (from cochlear nucleus to second-  
232 ary auditory cortical field) across the three SNRs and in the two noise conditions. Figures 5A and 5F  
233 present the EI values of all neurons (with a color code from blue to red when progressing from low to  
234 high EI values) and the color bars, on the right side, delineate the five clusters. This color code was

235 used for the 3D representations of the five clusters in the stationary (Fig. 5B) and chorus (Fig. 5G)  
236 noise. Figure 5C shows the mean EI values in stationary noise for these five clusters across the three  
237 SNRs and the percentage of neurons in each cluster is displayed in figure 5D. Approximately 10% of  
238 the neurons are target-ultraspecific characterized, on average, by EI values greater than 0.5 at +10 and  
239 0 dB SNRs. More than 25% are target-specific characterized, on average, by EI values greater than  
240 0.2 at +10 and 0 dB SNRs (Fig. 5C). About 5% of the neurons are SNR-dependent and more than  
241 40% of the total population has EI values around 0 at all SNRs which corresponds to the non-specific  
242 neurons. More than 10% of the auditory neurons have negative EI values at the three SNRs and corre-  
243 spond to masker-specific neurons. Figures 5H and 5I show the mean EI values for these five clusters  
244 in the chorus noise with, roughly, similar proportions of the five clusters as in the stationary noise.  
245 However, in the chorus noise there was a decrease in the proportions of neurons in the target-  
246 ultraspecific (from 10% to 7.5%) and target-specific (from 27% to 20%) clusters associated with an  
247 increase in the proportion of SNR-dependent neurons (from 6.5% to 19.5%), whereas the proportion  
248 of neurons in the non-specific cluster remained similar (42-39.5%). Note also that in the chorus noise,  
249 the two clusters of target-specific neurons showed, on average, lower EI values at the 0 dB SNR than  
250 in stationary noise (compared Fig. 5C and Fig. 5H). Based upon these quantifications, it is clear that,  
251 in the entire auditory system, the chorus noise impacted more the neuronal responses than the station-  
252 ary noise.

253 Next, we determined the proportions of each cluster in a given structure. In stationary noise, target-  
254 ultraspecific and target-specific neurons were mostly present in the inferior colliculus and thalamus,  
255 while the three other groups of neurons classified as SNR-dependent, non-specific, and masker-  
256 specific were mostly present in the cochlear nucleus and in the two cortical fields. For each auditory  
257 structure, the percentage of neurons from each cluster is presented in the stationary noise (Fig. 5E)  
258 and in the chorus noise (Fig. 5J). Statistical analyses confirmed that the proportion of the different  
259 clusters differed in the IC and MGv compared with the three other structures (all Chi-Square;  
260  $p < 0.001$ ). In chorus noise, the proportion of target-ultraspecific and target-specific neurons decreased  
261 in all structures but they remained in higher proportions in IC and MGv than in CN and in cortex. In  
262 the CN, there was also an increase in the proportion of target-specific neurons (from 7 to 14.5%). Sta-  
263 tistical analyses confirmed that, in the chorus noise too, the proportion of the different clusters dif-  
264 fered in the IC and MGv compared with the three other structures (all Chi-Square;  $p < 0.001$ ).

265 Plotting all EI values for the five clusters showed a good homogeneity across structures within each  
266 cluster type either in stationary or in chorus noise (Figure 5 - figure supplement 1), implying that a  
267 cortical neuron assigned to a particular cluster has the same behavior in noise than a subcortical neu-  
268 ron.

### Stationary noise

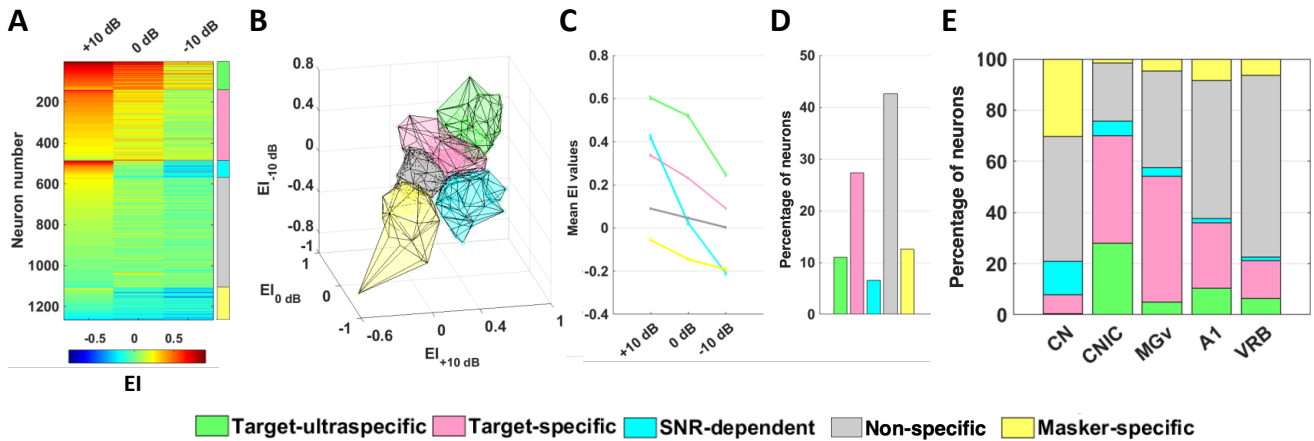

### Chorus noise

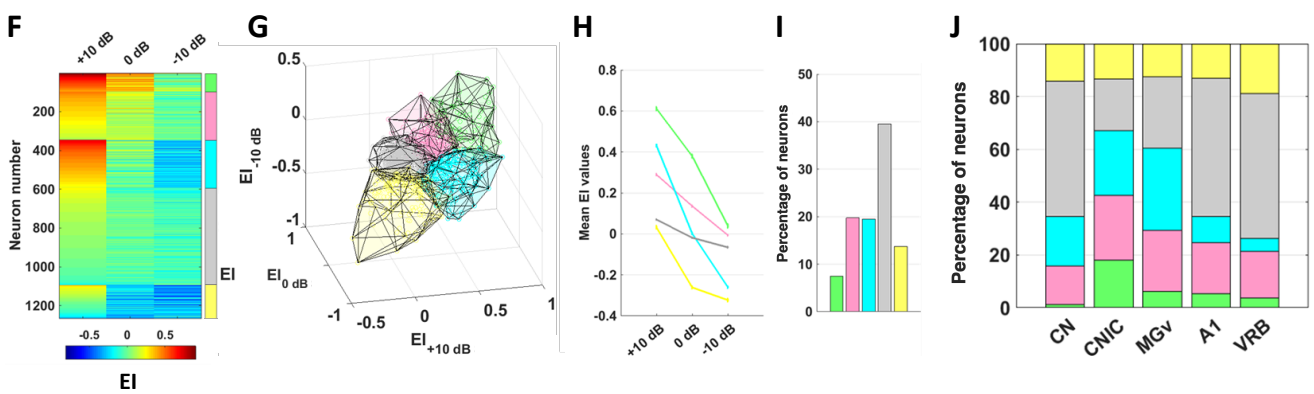

269

270 **Figure 5.** Five different groups of auditory neurons in noise. **A.** Each row corresponds to the EI profile of a  
 271 given neuronal recording obtained in the five auditory structures in stationary noise with a color code from blue  
 272 to red when progressing from low to high EI values. On the right, five stacked colors delineate the cluster iden-  
 273 tity for the five groups of neurons. The target-ultraspecific group is in green, the target-specific group in pink,  
 274 the SNR-dependent group in turquoise, the non-specific group in gray and the masker-specific group in yellow.  
 275 **B-E** 3D representation of the five clusters in stationary noise (B), mean EI values of the five clusters (C), rela-  
 276 tive proportions of each cluster in stationary noise (D) and proportion of each cluster in the five auditory struc-  
 277 tures from CN to VRB (E). **F-J.** Same representations as in A, B, C, D and E for the chorus noise.

278 **Figure supplement 1.** Five neuronal behaviors in noise are found at each stage of auditory system.

## Stationary noise

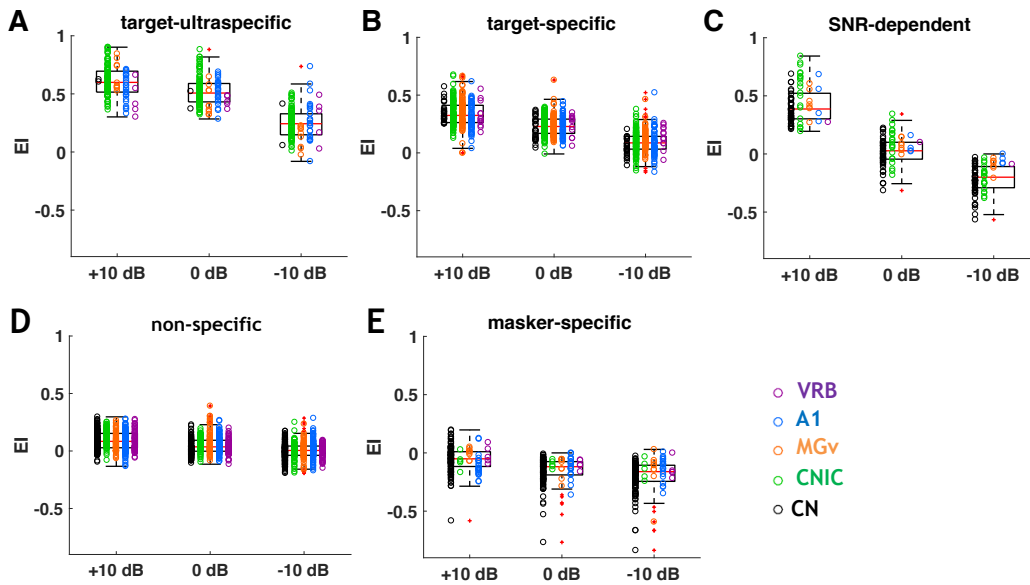

## Chorus noise

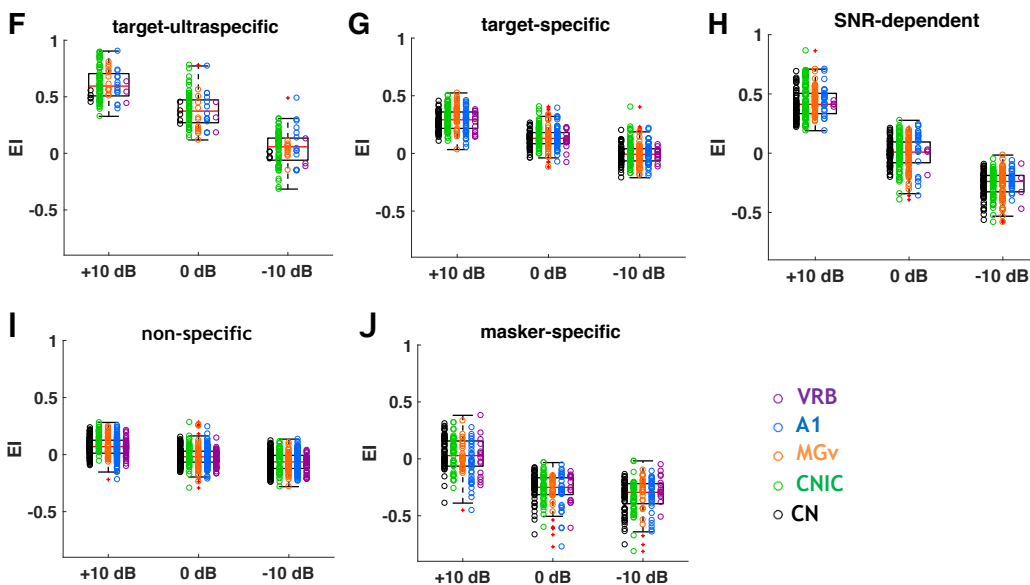

279

280 **Figure 5 - figure supplement 1.** Five neuronal behaviors in noise are found at each stage of auditory system.

281 **A-E.** The boxplots show all EI values obtained for the three SNRs tested (+10, 0 and -10 dB) in stationary

282 noise for each auditory structure (CN, (in black), CNIC (in green), MGv (in orange), A1 (in blue) and VRB (in

283 purple)) depending on the cluster assigned. **F-J.** Same representations as in A, B, C, D and E for the chorus

284 noise.

285

286 Therefore, in both noises, the neurons with a high fidelity representation of the target were mostly

287 present in the inferior colliculus and thalamus. The non-specific neurons showing no preference either

288 for the target or the noise were found in majority in the cochlear nucleus and in the auditory cortex.

289 The SNR-dependent neurons represented a small fraction of neurons in stationary noise but were more

290 numerous in the chorus noise. One interesting feature is that, in both types of noise, the proportion of

291 these SNR-dependent neurons decreases progressively as one ascends in the auditory system. Finally,

292 the neurons with a high fidelity representation of the noise were mostly localized in the cochlear nu-  
293 cleus in the stationary noise but were in an equivalent proportion in all structures (between 12.5% and  
294 19%) in the chorus noise.

295

### 296 **Collicular and thalamic neurons are most sensitive to the type of background noise**

297

298 In the marmoset auditory cortex, Ni and colleagues (2017) have pointed out that the neuronal behavior  
299 in noise can be context-dependent: the behavior of a given neuron in a particular noise does not pre-  
300 dict its behavior in another noise. Is this a property that characterizes cortical neurons, or is it a prop-  
301 erty that exists at all levels of the auditory system?

302 Overall, we found that the neuronal response behaviors at all levels of the auditory pathway were part-  
303 ly, but not completely, preserved in different types of noise (Fig. 6A). On the whole database of 1267  
304 recordings, about 50% of the target-ultraspecific and 40% of the target-specific neurons in the station-  
305 ary noise remained so in the chorus noise; most of the SNR-dependent (73.5%) and non-specific neu-  
306 rons (65.5%) in the stationary noise remained also in the same category in the chorus noise. Only the  
307 masker-specific neurons tended to switch category to mostly became non-specific neurons. Consider-  
308 ing the proportions of neurons in each category in stationary noise, as indicated on the x-axis of figure  
309 6A, around 45% of all recordings switched category in chorus noise (see Fig. 6B). Figure 6B shows  
310 that the target-ultraspecific, target-specific and masker-specific neurons were the three categories with  
311 the highest percentages of cluster changes ( $\chi^2$   $p < 0.001$ ). We used a bootstrap procedure to have a bet-  
312 ter estimation of the percentage of cluster changes (see Methods section). Briefly, for each recording,  
313 and from the 20 trials obtained for each stimulus, we resampled 20 trials (allowing repetitions),  
314 recomputed the Extraction Index and reallocated each resampled recording in the closest cluster. This  
315 entire procedure was performed 100 times for each recording. We assumed that in a given type of  
316 noise, a recording could change category because of its response variability and/or because it was lo-  
317 cated very close to a border between two clusters, independently to the change in noise type. With the  
318 resampled data obtained from the bootstrap procedure, we determined, for each cluster type (Fig. 6B),  
319 and each structure (Fig. 6C), the percentage of cluster change averaged for the two types of noise.

320 For each cluster type, except for the non-specific cluster, around 25% of resampled data switched cat-  
321 egory, which is indicated by the grey section (Fig. 6B). For the non-specific cluster, less than 20%  
322 changed category with the resampled data (Fig. 6B). When subtracting these bootstrapped percent-  
323 ages, we obtained the bootstrap-corrected values of the percentage of cluster change in each cluster,  
324 which dropped the percentages of cluster changes obtained with physiological data to only 16-30% for  
325 the target-ultraspecific, target-specific, non-specific and masker-specific neurons. For the SNR-  
326 dependent neurons, the cluster change observed with physiological data is absent when subtracting the

327 bootstrapped percentage obtained for this cluster type suggesting that the SNR-dependent neurons  
 328 changed category very little or not at all in chorus noise.

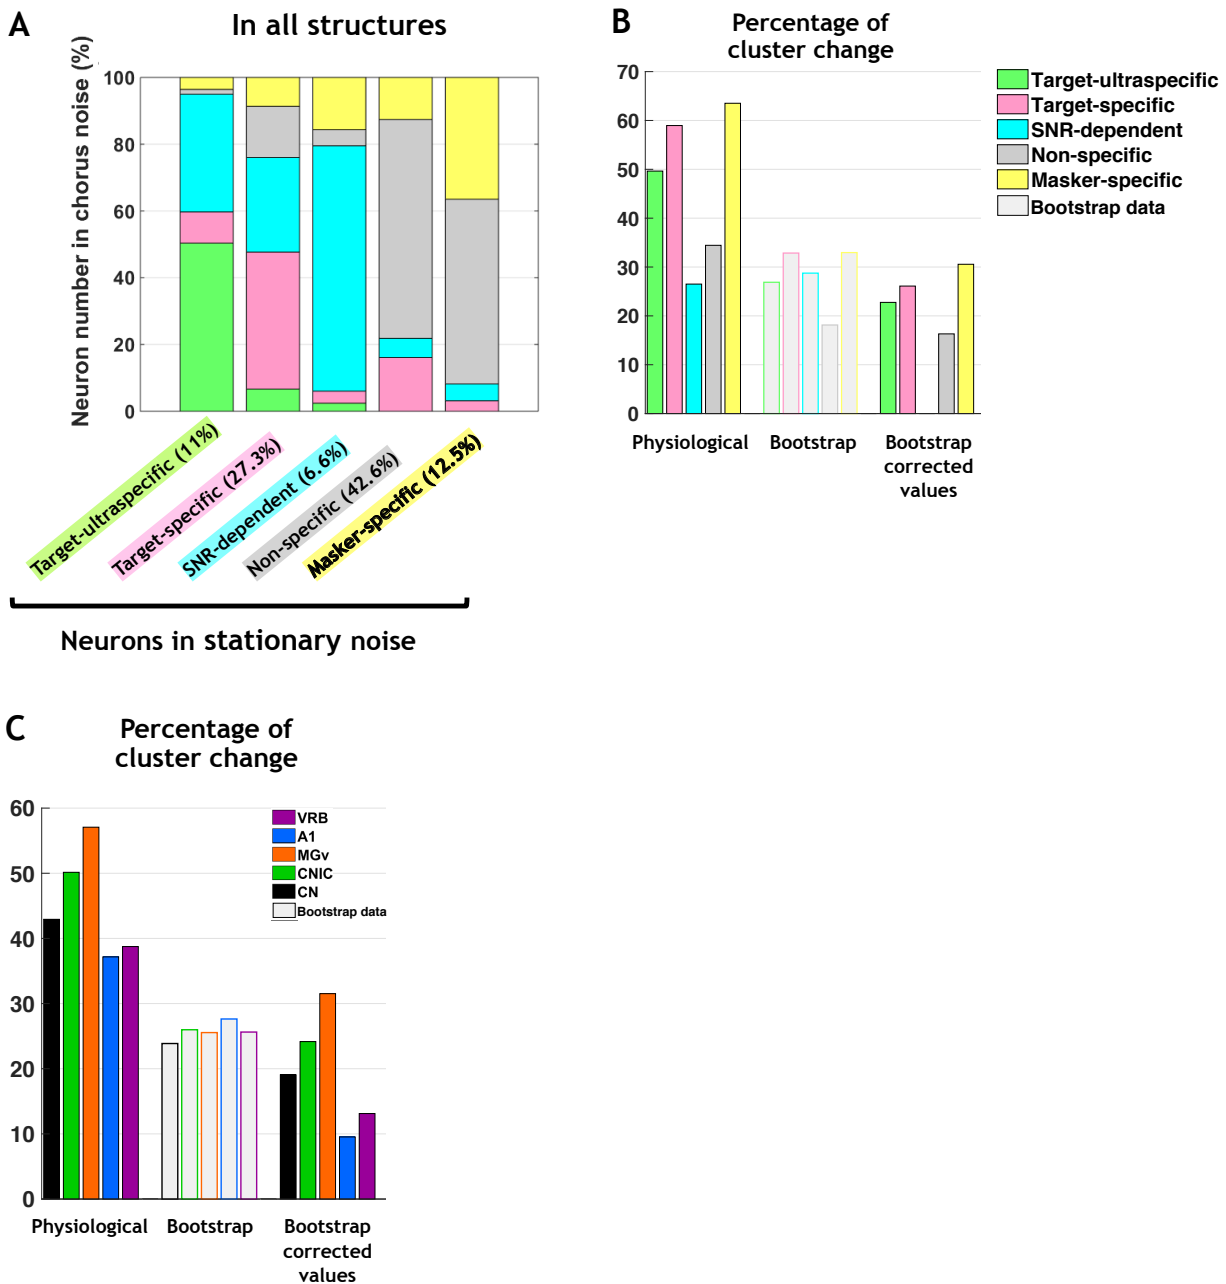

329  
 330 **Figure 6. Clustering change from one background noise to another is found at each stage of the auditory**  
 331 **system.** **A.** Percentage of neurons in a given cluster in chorus noise depending on the cluster originally assigned  
 332 in the stationary noise. The abscissa indicate the cluster identity in the stationary noise and the ordinates repre-  
 333 sent the cluster identity in the chorus noise. For example, target-ultraspecific neurons in stationary noise are  
 334 also 50% target-ultraspecific in chorus noise but 10% are reclassified as target-specific, 35% SNR-dependent,  
 335 1.5% non-specific and 3.5% masker-specific. **B.** Percentage of neurons changing of cluster from the stationary  
 336 noise to the chorus noise for each cluster computed based on physiological and bootstrapped data (grey bars).  
 337 The corrected-bootstrap values correspond to the subtraction of the bootstrapped values from the physiological  
 338 values. **C.** Mean percentage of cluster change from the stationary noise to the chorus noise in VRB, (in purple),  
 339 A1 (in blue), MGv (in orange), CNIC (in green) and CN (in black). The grey bars represents the percentage of  
 340 cluster change computed based on bootstrap analysis (see Method section).  
 341 **Figure supplement 1.** Bootstrapped data.



342 We performed the same analysis for each auditory structure (Figure 6 - figure supplement 1, Fig. 6C).  
 343 On average, between 21 and 31 out of 100 bootstrapped data per recording changed cluster in cortical  
 344 and subcortical structures in both noises (Figure 6 - figure supplement 1). Thus, with only the  
 345 resampled data, there is, on average, an important fraction of the recordings changed cluster in each  
 346 structure suggesting that the response variability and/or the proximity of the borders between two  
 347 clusters induced cluster changes. Figure 6C presents the mean percentage of cluster change obtained  
 348 from the physiological data for each auditory structure: for the two cortical areas about 38% of the  
 349 neurons changed categories, it was 57% in the MGv, 50% in the inferior colliculus and 43% in the  
 350 cochlear nucleus. With bootstrapped data, in all auditory structures, between 20 to 30% of the neurons  
 351 changed category, which is indicated by the grey section. When subtracting these bootstrapped per-  
 352 centages, we obtained the bootstrap-corrected values of the percentages of cluster changes in each  
 353 structure, which dropped the percentage of cluster change obtained with physiological data to only 10-  
 354 30% (Fig. 6C). The percentage of neurons changing category was higher in the inferior colliculus and  
 355 thalamus (31-22%) than in the cochlear nucleus and the auditory cortex (14% on average; Fig. 6C).  
 356 Therefore, the noise-type sensitivity is present at each stage of the auditory system but represents  
 357 small proportions. Furthermore, the inferior colliculus and the thalamus had the most noise-type sensi-  
 358 tive neurons, the fewest were found in the auditory cortex.  
 359

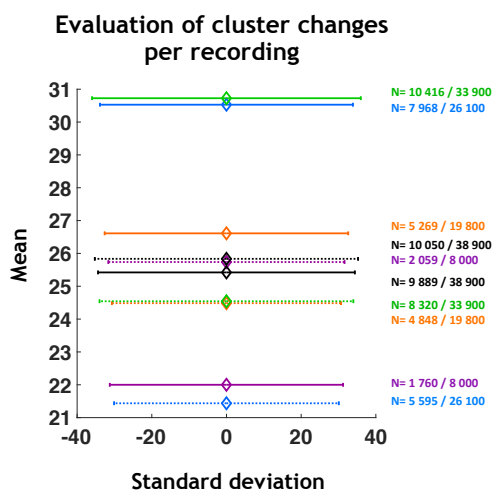

360  
 361 **Figure 6 - figure supplement 1.** Bootstrapped data. Means and standard deviations of cluster changes per re-  
 362 cording obtained with bootstrapped data in stationary noise (solid lines) and chorus noise (dotted lines) for each  
 363 auditory structure. The numbers to the right of the figure indicate the cumulative bootstrapped data.  
 364 For example, in thalamus and in stationary noise (orange solid lines), out of 19 800 bootstrap data, 5 269  
 365 (26.6%) changed cluster from stationary noise to the chorus noise.  
 366  
 367 One of the questions that should be addressed is whether or not the robustness to noise detected here  
 368 is correlated to the response characteristics obtained with the original vocalizations in quiet. For ex-  
 369 ample, one can envision that the EI value (and its evolution across the three SNRs) is related either to

370 the strength or temporal reliability of the responses, or the ability to discriminate the four original vo-  
371 calizations. Therefore, in both noises, we looked for potential correlations between the EI values and  
372 the response parameters to the original vocalizations. We focused only on the neurons exhibiting the  
373 same neuronal behavior in the two noises ( $n_{\text{Total}}=685$ ,  $n_{\text{CN}}=222$ ,  $n_{\text{CNIC}}=169$ ,  $n_{\text{MGV}}=81$ ,  $n_{\text{A1}}=164$ ,  
374  $n_{\text{VRB}}=49$ ) to look for correlations between stable EI values and other parameters obtained in quiet. For  
375 these neurons, the evoked firing rate was significantly higher in the subcortical structures than in the  
376 cortex (unpaired t-test, lowest p-value  $p<0.001$ ; Fig. 7A). The CorrCoef values were significantly  
377 higher in CNIC and MGv compared to A1 and VRB (Fig. 7B), and the  $\text{MI}_{\text{Individual}}$  values obtained at  
378 the subcortical level were also significantly higher than at the cortical level (unpaired t-test, highest  
379  $p<0.001$  between the cortex and the subcortical structures; Fig. 7C).

380 Generally, both for the stationary noise (Fig. 7D-F) and for the chorus noise (Fig. 7G-I), the strongest  
381 correlations were found between the EI values and the CorrCoef values (Fig. 7F, 7I; for example  $r_{\text{CNIC}}$   
382  $= 0.65$ ;  $r_{\text{CN}} = 0.45$ ;  $r_{\text{A1}} = 0.41$  for the stationary noise), whereas much weaker correlations (if any) were  
383 found with the evoked firing rate (Fig. 7D, 7G; for example  $r_{\text{CNIC}} = 0.34$ ;  $r_{\text{CN}} = 0.21$ ;  $r_{\text{A1}} = 0.17$  for the  
384 stationary noise) or with the MI values (Fig. 7E, 7H; for example  $r_{\text{CNIC}} = 0.61$ ;  $r_{\text{CN}} = 0.33$ ;  $r_{\text{A1}} = 0.30$   
385 for the stationary noise). Except in one case, the same significant correlations were found in the cho-  
386 rus noise (see Table 2). Note that the strongest correlations between the EI and the CorrCoef values  
387 were obtained in the inferior colliculus (0.65 and 0.63 in stationary and chorus noise respectively).

388 These results suggest that the trial-to-trial temporal reliability is the factor the more correlated with the  
389 robustness to noise, especially in the inferior colliculus, the auditory structure where we detected the  
390 largest number of target-specific neurons.

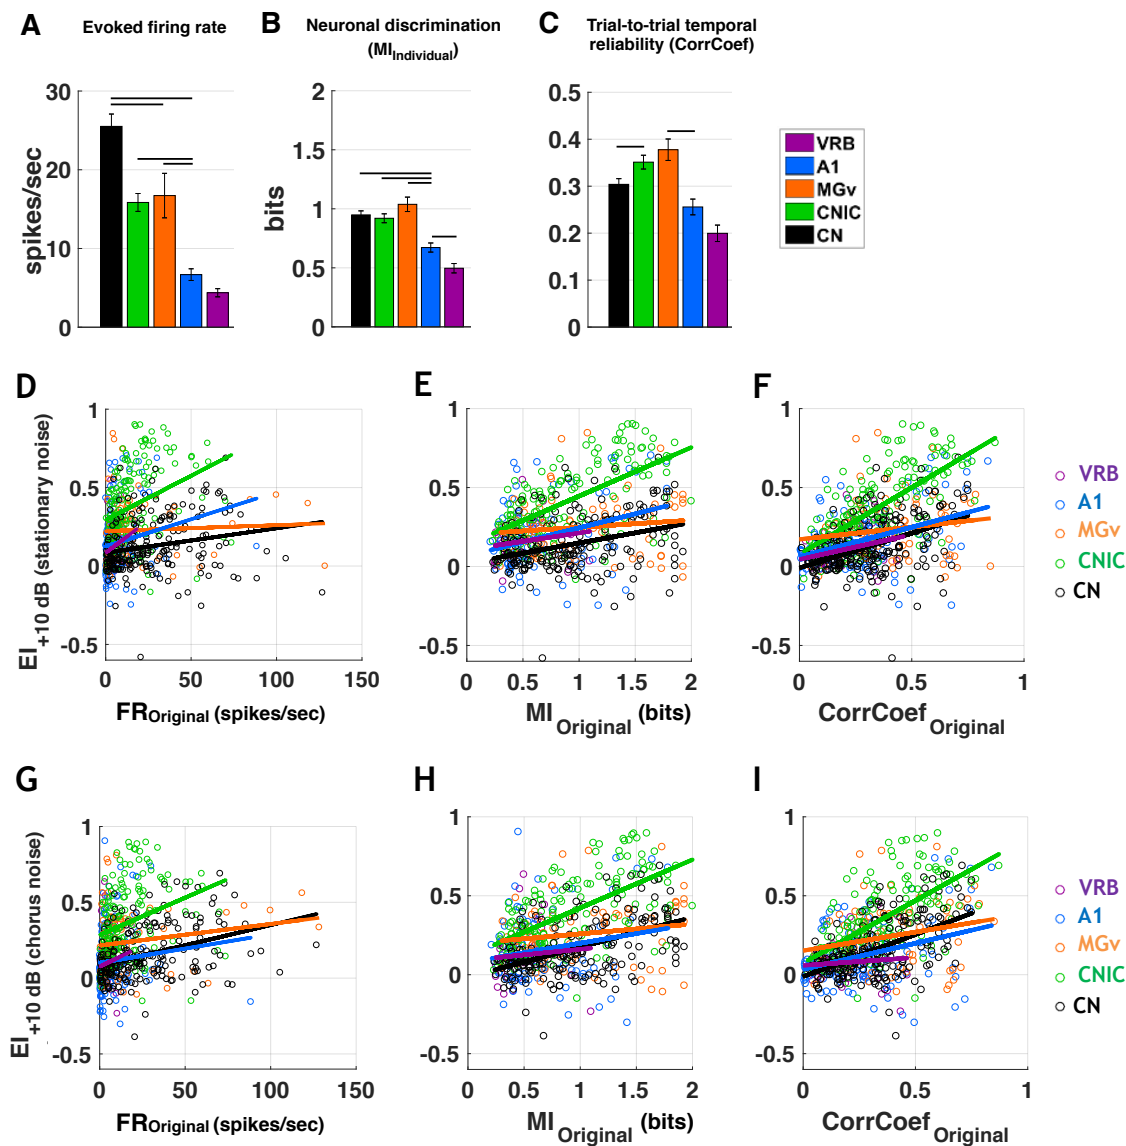

391

392

393

394

395

396

397

398

399

400

401

402

403

404

405

406

407

408

409

**Figure 7. The trial-to-trial temporal reliability of responses in original conditions is correlated with the capacity of neurons to resist in noise.** A-C. The bar graphs show the mean values of (A) the evoked firing rate (spikes/sec), the neuronal discrimination assessed by the mutual information (MI) computed at the level of the individual recording ( $MI_{\text{individual}}$ , bits) (B) and the trial-to-trial temporal reliability quantified by the CorrCoef value (C) obtained with the four original vocalizations for only the neurons that remained in the same category in both noises in CN (in black), CNIC (in green), MGv (in orange), A1 (in blue) and VRB (in purple). The evoked firing rate corresponds to the total number of action potentials occurring during the presentation of the stimulus minus spontaneous activity (200 ms before each acoustic stimulus). In each structure, error bars represent the SEM of the mean values and black lines represent significant differences between the mean values (unpaired t test,  $p < 0.05$ ). The evoked firing rate decreases from the CN to VRB but both the trial-to-trial temporal reliability (CorrCoef) and the discrimination performance (MI) reach a maximal value in subcortical structures. D-F. Scattergrams of the EI values obtained at the +10 dB SNR in stationary noise as a function of the evoked firing rate (in spikes/sec), mutual information (MI, bits) and CorrCoef values obtained with the original vocalizations based on neuronal responses recorded in CN, CNIC, MGv, A1 and VRB for only the neurons that remained in the same category in both noises. G-I. Same representations as in D, E, F and d for the EI values obtained at the +10 dB SNR in chorus noise.

|      | Correlations with the EI index (r) |        |            |        |            |        |
|------|------------------------------------|--------|------------|--------|------------|--------|
|      | Evoked FR                          |        | MI         |        | CorrCoef   |        |
|      | Stationary                         | Chorus | Stationary | Chorus | Stationary | Chorus |
| CN   | 0.21*                              | 0.36*  | 0.33*      | 0.48*  | 0.45*      | 0.55*  |
| CNIC | 0.34*                              | 0.30*  | 0.61*      | 0.61*  | 0.65*      | 0.63*  |
| MGv  | 0.05                               | 0.18   | 0.13       | 0.16   | 0.17       | 0.24   |
| A1   | 0.17*                              | 0.09   | 0.30*      | 0.20*  | 0.41*      | 0.34*  |
| VRB  | 0.23                               | 0.13   | 0.16       | 0.08   | 0.32*      | 0.09   |

410

411

412

413

414

415

**Table 2.** Correlations values between the EI index obtained in both noises and the different parameters quantifying neuronal responses in quiet. (\*) indicates significant correlations ( $p < 0.05$ ).

416

## Discussion

417 Here, we demonstrate that the processing of noisy vocalizations by neurons in the entire auditory sys-  
418 tem can be described by a limited number of neuronal behaviors found in different proportions de-  
419 pending on the auditory structure and the type of the masking noise. Target-specific neurons were  
420 detected at each level of the auditory system but were in higher proportions at the collicular and tha-  
421 lamic level. For these neurons, the trial-to-trial temporal reliability of the responses in quiet is corre-  
422 lated to the robustness of responses in noise. In terms of proportions, the highest fidelity representa-  
423 tion of the target or noise was found at the subcortical level whereas at the cortical level, the majority  
424 of neuronal responses showed no preference for the target or the noise suggesting that cortical neurons  
425 are more independent of the spectro-temporal characteristics of the noisy vocalizations. At each stage  
426 of the auditory system, neurons sensitive to the type of noise were observed in small proportions,  
427 mostly in inferior colliculus and thalamus.

428

### 429 **Robustness to noise in the auditory system: a localized vs. distributed property?**

430

431 In the A1 of awake marmosets, Ni and colleagues (2017) found about 20-30% of robust neurons (de-  
432 pending on the vocalization), called here target-specific neurons. In our cortical data, when pooling  
433 together the target-ultraspecific and target-specific neurons, we obtained about the same proportions  
434 as in the marmoset A1 (33%). In the bird auditory system, Schneider and Woolley (2013) described  
435 the emergence of noise-invariant responses for a subset of cells (the broad spike cells) of a secondary  
436 auditory area (area NCM), whereas upstream neurons (IC and A1 neurons in their study) represent  
437 vocalizations with dense and background-corrupted responses. They suggest that the sparse coding  
438 scheme operating within NCM allows the emergence of this noise-invariant representation. In our  
439 study (and in the mammalian A1 in general), a sparse representation already exists as early as A1 (see  
440 the rasters in Fig. 2, see also Hromádka et al., 2008) allowing target-ultraspecific and target-specific  
441 neurons to be present in about the same proportions in A1 and the secondary area VRB.

442 Noise-invariant representations were also reported in A1 of anesthetized ferrets (Rabinowitz et al.,  
443 2013). This study suggested a progressive emergence of noise-invariant responses from the auditory  
444 nerve to IC and to A1, and proposed the adaptation to the noise statistics as a key mechanism to ac-  
445 count for the noise-invariant representation in A1. However, a large fraction of their IC neurons also  
446 showed responses that were independent of the background noise (see their Fig. 2C) and adapted to  
447 the stimulus statistics (see their Fig. 4B), suggesting that the behavior of IC and A1 neurons did not  
448 fundamentally differ in their adaptation to noise statistics.

449 Based upon the proportion of target-ultraspecific and target-specific neurons, it seems that the robust-  
450 ness to noise peaks in CNIC, with the MGv neurons being at the intermediate level between IC and

451 A1 (Figures 5E, 5J). In fact, our results point out an abrupt change from a prominent noise-sensitivity  
452 in CN to a prominent noise-robustness in IC, which means that this robustness is generated by neural  
453 computation taking place in the central auditory system. Whether this is an intrinsic property emerg-  
454 ing *de novo* in the IC or whether this property emerges as a consequence of cortical feedbacks (Malm-  
455 ierca and Ryugo, 2011) which can promote behavioral plasticity (Bajo et al., 2010; Robinson et al.,  
456 2016) remains to be determined. Nonetheless, several studies have clearly demonstrated that IC neu-  
457 rons adapt to the stimulus statistics. First, adaptations of IC neurons to the average stimulus intensity,  
458 stimulus variance and bimodality that has already been described with a temporal decay of about 160  
459 ms at 75 dB (Dean et al., 2005; 2008). Second, adaptation to the noise statistics shifted the temporal  
460 modulation function (TMF) of IC neurons to slower modulations, sometimes transforming band-pass  
461 TMF to low pass TMF in about 200 ms of noise presentation (Lesica and Groethe, 2008).

462 Our results do not indicate a progressive evolution from sensitivity to robustness to noise along the  
463 central auditory system. However, based upon the proportion of SNR-dependent neurons, one inte-  
464 resting result is that, in both types of noise, these neurons decreased progressively as one ascends in  
465 the auditory system which is in line with the idea of a progressive construction of an invariant repre-  
466 sentation of acoustic signals in noise described by Rabinowitz and colleagues (2013).

467 We also showed that the higher the trial-to-trial temporal reliability of the responses in quiet, the high-  
468 er the robustness of the neurons in noise, especially in the IC where we detected the highest propor-  
469 tion of target-specific neurons. In fact, it was previously reported that the firing rate and the temporal  
470 reliability of IC neurons decreased when vocalizations were presented in natural stationary noise, but  
471 they were still efficiently detected target stimuli in noise (Lesica and Groethe, 2008). Together, this  
472 suggests that the more temporally precise are the synaptic inputs converging on a particular neuron,  
473 the more the responses of this neuron are robust in background noise.

474 The subcortical robustness to noise described here might be surprising given that numerous studies  
475 have pointed out the robustness of cortical representations in noise. However, Las and colleagues  
476 (2005) reported that A1, MGB and IC neurons can detect low-intensity target tones in a louder fluctu-  
477 ating masking noise and display the so-called “phase-locking suppression”, that is the interruption of  
478 phase-locking to the temporal envelope of background noise. The last result indicates that, as cortical  
479 neurons, both IC and MGB neurons have the ability to detect low-intensity target sounds in louder  
480 background noise (even at -15 or -35 dB SNR) and the robustness of some of our subcortical neurons  
481 may stem from this ability to detect target vocalizations even at SNR as low as the -10 dB SNR.

482 Robust perception of target sounds probably also requires a robust representation of competing sounds  
483 (here, masking noise). This can be the functional role of the masker-specific neurons, which are po-  
484 tentially crucial to determine the characteristics of the noise type and to provide an accurate represen-  
485 tation of it within the auditory stream reaching our ears at any time. They were detected here, in high-

486 er proportion in the CN in stationary noise, but they became more numerous and in equivalent propor-  
487 tion in all structures in chorus noise. Therefore, the noise representation can be based upon the neu-  
488 ronal activity in the cochlear nucleus in stationary noise, whereas this representation can be more dis-  
489 tributed in the chorus noise potentially because some of the target-ultraspecific or the target-specific  
490 neurons in stationary noise became masked-specific neurons in chorus noise, due to its spectro-  
491 temporal acoustic richness.

492 In our results, the five categories rather form a continuum with no clear boundaries between clusters,  
493 which inevitably led us to « impose » the clustering. Nonetheless, despite the lack of precise bounda-  
494 ries, 75% of the neurons remained assigned to the same cluster when the bootstrap procedure was per-  
495 formed (Fig. 6B-C), suggesting a relatively good reliability of the classification. Also, these five cate-  
496 gories do represent distinct neuronal behaviors in the two types of noise, which have been previously  
497 described at the cortical level in awake marmoset (Ni et al., 2017). Here, in the auditory cortex of  
498 anesthetized animals, we found these same global behaviors, and our results show that these catego-  
499 ries also exist at the subcortical level. Thus, the cortical representation of noisy signals by different  
500 neuronal categories characterized either by the preference of the target, the noise, a sensitivity to SNR  
501 or an absence of these three acoustic features, is independent of the state of alertness of the animal.  
502 We can wonder if choosing 7, 8, or 9 clusters, would have highlighted other neuron behaviors. A part  
503 of the answer is provided by figure 4, which shows that with 6 clusters, similar behaviors re-appear  
504 suggesting that a larger number of clusters would have been non-informative. As we collected multi-  
505 unit recordings composed of 2-6 shapes of action potentials, it is possible that more specific behaviors  
506 might have been missed in our analyses. This is potentially the case at the cortical level where a large  
507 number of cell types have been described (Ascoli et al., 2008; DeFelipe et al., 2013) and also in the  
508 cochlear nucleus (Cant and Benson, 2003; Kuenzel, 2019). However, based on the output of small  
509 groups of neurons, five neuronal behaviors seem to be present in noise at all the levels of the auditory  
510 system.

511  
512 **Noise-type sensitivity is present, in small proportions, at each stage of the auditory system but**  
513 **mostly in the inferior colliculus and thalamus**

514  
515 Ni and colleagues (2017) found about two-thirds of cortical neurons switching category from one  
516 background noise to another, suggesting that the majority of cortical neurons have a behavior specific  
517 to the type of noise. Although we initially found between 40 and 60% of such neurons in the different  
518 auditory structures, the bootstrap procedure indicated that more realistic percentages should be much  
519 lower, potentially between 10-30%. Also, the response variability, which is probably much larger in  
520 awake than in anesthetized animals, can explain the difference between our results and those of Ni and

521 colleagues (2017). Here, these neurons were detected in auditory cortex but were found in higher pro-  
522 portions in subcortical structures. This indicates that only a small fraction of neurons display a behav-  
523 ior specific to a particular noise. We preferred to call this phenomenon noise-type sensitivity rather  
524 context-dependence (proposed by Ni and colleagues, 2017) because the latter refers to situations  
525 where the same stimulus is presented in different contexts; whereas here inserting target stimuli in two  
526 types of noise generated different auditory streams. As mentioned by Ni and colleagues (2017), if a  
527 larger number of noise types would have been tested, the proportion of neurons within each category  
528 would have been different. For example, a larger fraction of neurons can potentially be considered as  
529 target-specific or masker-specific, because masker-specific neurons in a particular type of noise can  
530 be the target-specific ones in another noise. Their assumption may still be valid but we show that it  
531 only concerns a small fraction of neurons.

532

### 533 **General conclusion**

534

535 Over the last years, several mechanisms have been proposed to explain the robust cortical representa-  
536 tion of speech in noise: from an ultra-sparse cortical representation (Asari et al., 2006; Schneider and  
537 Woolley, 2013), to a dynamic model of synaptic depression combined with a feedback gain normali-  
538 zation (Mesgarani et al., 2014), or to an adaptation to the noise statistics (Rabinowitz et al., 2013).  
539 Quantifications of high gamma activity (which reflects the average firing rate of nearby neurons, e.g.  
540 see Steinschneider et al., 2011) has recently revealed that the human auditory cortex rapidly adapts to  
541 various type of background noises (Khalighinejad et al., 2019). More precisely, speech can be recon-  
542 structed from large-scale neuronal recordings (167 electrodes) even when the background noise regu-  
543 larly changes, probably because neural adaptation suppresses the representation of noise features, a  
544 mechanism that seems to be independent of the attentional focus of the listeners.

545 Here, we propose that the noise-robustness observed in many studies at the cortical level stems, at  
546 least partially, from subcortical mechanisms (Lesica and Groethe, 2008; Rabinowitz et al., 2013) and  
547 potentially even from adaptation mechanisms already present in auditory hair cells (such as changes in  
548 gain and kinetics, see Fettiplace and Ricci, 2003). Therefore, the auditory cortex potentially inherits  
549 adaptation from earlier levels, allowing the cortical networks to focus on higher-level processing such  
550 as classifying the target stimuli into phonetic or linguistic features (Mesgarani et al., 2014), segregat-  
551 ing the different auditory streams (Mesgarani and Chang, 2012) integrating multimodal information  
552 (Deneux et al., 2019), and retaining behaviorally important stimuli in short term (Huang et al., 2016)  
553 or long term memory (Moczulska et al., 2013; Concina et al., 2019).

554



555

## Materials and Methods

556 Most of the Methods are similar as in the article Souffi and colleagues (2020).

### 557 **Subjects**

558 These experiments were performed under the national license A-91-557 (project 2014-25, authoriza-  
559 tion 05202.02) and using the procedures N° 32-2011 and 34-2012 validated by the Ethic committee  
560 N°59 (CEEA, Comité d’Ethique pour l’Expérimentation Animale) Paris Centre et Sud). All surgical  
561 procedures were performed in accordance with the guidelines established by the European Communi-  
562 ties Council Directive (2010/63/EU Council Directive Decree).

563 Extracellular recordings were obtained from 47 adult pigmented guinea pigs (aged 3 to 16 months, 36  
564 males, 11 females) at five different levels of the auditory system: the cochlear nucleus (CN), the infe-  
565 rior colliculus (IC), the medial geniculate body (MGB), the primary (A1) and secondary (area VRB)  
566 auditory cortex. Animals, weighting from 515 to 1100 g (mean 856 g), came from our own colony  
567 housed in a humidity (50-55%) and temperature (22-24°C)-controlled facility on a 12 h/12 h  
568 light/dark cycle (light on at 7:30 A.M.) with free access to food and water.

569 Two days before the experiment, the animal’s pure-tone audiogram was determined by testing audito-  
570 ry brainstem responses (ABR) under isoflurane anaesthesia (2.5 %) as described in Gourévitch et al.  
571 (2009). A software (RTLab, Echodia, Clermont-Ferrand, France) allowed averaging 500 responses  
572 during the presentation of nine pure-tone frequencies (between 0.5 and 32 kHz) delivered by a speaker  
573 (Knowles Electronics) placed in the animal right ear canal. The auditory threshold of each ABR was  
574 the lowest intensity where a small ABR wave can still be detected (usually wave III). For each fre-  
575 quency, the threshold was determined by gradually decreasing the sound intensity (from 80 dB down  
576 to -10 dB SPL). All animals used in this study had normal pure-tone audiograms (Gourévitch et al.,  
577 2009; Gourévitch and Edeline, 2011).

### 578 **Surgical procedures**

579 All animals were anesthetized by an initial injection of urethane (1.2 g/kg, i.p.) supplemented by addi-  
580 tional doses of urethane (0.5 g/kg, i.p.) when reflex movements were observed after pinching the hind  
581 paw (usually 2-4 times during the recording session). A single dose of atropine sulphate (0.06mg/kg,  
582 s.c.) was given to reduce bronchial secretions and a small dose of buprenorphine was administrated  
583 (0.05mg/kg, s.c.) as urethane has no antalgic properties. After placing the animal in a stereotaxic  
584 frame, a craniotomy was performed and a local anesthetic (Xylocain 2%) was liberally injected in the  
585 wound.

586 For auditory cortex recordings (area A1 and VRB), a craniotomy was performed above the left tem-  
587 poral cortex. The dura above the auditory cortex was removed under binocular control and the cere-

588 brospinal fluid was drained through the cisterna to prevent the occurrence of oedema. For the record-  
589 ings in MGB, a craniotomy was performed the most posterior part of the MGB (8mm posterior to  
590 Bregma) to reach the left auditory thalamus at a location where the MGB is mainly composed of its  
591 ventral, tonotopic, part (Redies et al., 1989, Edeline et al., 1999; Anderson et al., 2007; Wallace et al.,  
592 2007). For IC recordings, a craniotomy was performed above the IC and portions of the cortex were  
593 aspirated to expose the surface of the left IC. For CN recordings, after opening the skull above the  
594 right cerebellum, portions of the cerebellum were aspirated to expose the surface of the right CN  
595 (Paraouty et al., 2018).

596 After all surgery, a pedestal in dental acrylic cement was built to allow an atraumatic fixation of the  
597 animal's head during the recording session. The stereotaxic frame supporting the animal was placed in  
598 a sound-attenuating chamber (IAC, model AC1). At the end of the recording session, a lethal dose of  
599 Exagon (pentobarbital >200 mg/kg, i.p.) was administered to the animal.

## 600 **Recording procedures**

601 Data from multi-unit recordings were collected in 5 auditory structures, the non-primary cortical area  
602 VRB, the primary cortical area A1, the medial geniculate body (MGB), the inferior colliculus (IC) and  
603 the cochlear nucleus (CN). In a given animal, neuronal recordings were only collected in one auditory  
604 structure.

605 Cortical extracellular recordings were obtained from arrays of 16 tungsten electrodes ( $\varnothing$ : 33  $\mu\text{m}$ , <1  
606 M $\Omega$ ) composed of two rows of 8 electrodes separated by 1000  $\mu\text{m}$  (350  $\mu\text{m}$  between electrodes of the  
607 same row). A silver wire, used as ground, was inserted between the temporal bone and the dura matter  
608 on the contralateral side. The location of the primary auditory cortex was estimated based on the pat-  
609 tern of vasculature observed in previous studies (Wallace et al., 2000; Gaucher et al., 2013; Gaucher  
610 and Edeline, 2015). The non-primary cortical area VRB was located ventral to A1 and distinguished  
611 because of its long latencies to pure tones (Rutkowski et al., 2002; Grimsley et al., 2012). For each  
612 experiment, the position of the electrode array was set in such a way that the two rows of eight elec-  
613 trodes sample neurons responding from low to high frequency when progressing in the rostro-caudal  
614 direction [see examples in figure 1 of Gaucher et al. (2012) and in figure 6A of Ocelli et al. (2016)].

615 In the MGB, IC and CN, the recordings were obtained using 16 channel multi-electrode arrays (Neu-  
616 roNexus) composed of one shank (10 mm) of 16 electrodes spaced by 110  $\mu\text{m}$  and with conductive  
617 site areas of 177 $\mu\text{m}^2$ . The electrodes were advanced vertically (for MGB and IC) or with a 40° angle  
618 (for CN) until evoked responses to pure tones could be detected on at least 10 electrodes.

619 All thalamic recordings were from the ventral part of MGB (see above surgical procedures) and all  
620 displayed latencies < 9ms. At the collicular level, we distinguished the lemniscal and non-lemniscal  
621 divisions of IC based on depth and on the latencies of pure tone responses. We excluded the most su-  
622 perfcial recordings (until a depth of 1500 $\mu\text{m}$ ) and those exhibiting latency  $\geq$  20ms in an attempt to

623 select recordings from the central nucleus of IC (CNIC). At the level of the cochlear nucleus, the re-  
624 cordings were collected from both the dorsal and ventral divisions.

625 The raw signal was amplified 10,000 times (TDT Medusa). It was then processed by an RX5 multi-  
626 channel data acquisition system (TDT). The signal collected from each electrode was filtered (610-  
627 10000 Hz) to extract multi-unit activity (MUA). The trigger level was set for each electrode to select  
628 the largest action potentials from the signal. On-line and off-line examination of the waveforms sug-  
629 gests that the MUA collected here was made of action potentials generated by a few neurons at the  
630 vicinity of the electrode. However, as we did not use tetrodes, the result of several clustering algo-  
631 rithms (Pouzat et al., 2002; Quiroga et al., 2004; Franke et al., 2015) based on spike waveform anal-  
632 yses were not reliable enough to isolate single units with good confidence. Although these are not  
633 direct proofs, the fact that the electrodes were of similar impedance (0.5-1M $\Omega$ ) and that the spike  
634 amplitudes had similar values (100-300 $\mu$ V) for the cortical and the subcortical recordings, were two  
635 indications suggesting that the cluster recordings obtained in each structure included a similar number  
636 of neurons. Even if a similar number of neurons were recorded in the different structures, we cannot  
637 discard the possibility that the homogeneity of the multi-unit recordings differ between structures. By  
638 collecting several hundreds of recordings in each structure, these potential differences in homogeneity  
639 should be attenuated in the present study.

#### 640 **Acoustic stimuli**

641 Acoustic stimuli were generated using MatLab, transferred to a RP2.1-based sound delivery system  
642 (TDT) and sent to a Fostex speaker (FE87E). The speaker was placed at 2 cm from the guinea pig's  
643 right ear, a distance at which the speaker produced a flat spectrum ( $\pm$  3 dB) between 140 Hz and 36  
644 kHz. Calibration of the speaker was made using noise and pure tones recorded by a Bruel and Kjaer  
645 microphone 4133 coupled to a preamplifier BandK 2169 and a digital recorder Marantz PMD671.

646 The Time-Frequency Response Profiles (TFRP) were determined using 129 pure-tones frequencies  
647 covering eight octaves (0.14-36 kHz) and presented at 75 dB SPL. The tones had a gamma envelop  
648 given by  $\gamma(t) = (\frac{t}{4})^2 * e^{-t/4}$ , where t is time in ms. At a given level, each frequency was repeated  
649 eight times at a rate of 2.35 Hz in pseudorandom order. The duration of these tones over half-peak  
650 amplitude was 15 ms and the total duration of the tone was 50 ms, so there was no overlap between  
651 tones.

652 A set of four conspecific vocalizations was used to assess the neuronal responses to communication  
653 sounds. These vocalizations were recorded from animals of our colony. Pairs of animals were placed  
654 in the acoustic chamber and their vocalizations were recorded by a Bruel & Kjaer microphone 4133  
655 coupled to a preamplifier B&K 2169 and a digital recorder Marantz PMD671. A large set of whistle  
656 calls was loaded in the Audition software (Adobe Audition 3) and four representative examples of

657 whistle were selected. As shown in figure 1a (lower panels), despite the fact the maximal energy of  
658 the four selected whistle was in the same frequency range (typically between 4 and 26 kHz), these  
659 calls displayed slight differences in their spectrograms. In addition, their temporal (amplitude) enve-  
660 lopes clearly differed as shown by their waveforms (Fig. 1a, upper panels).

661 The four whistles were also presented in two frozen noises ranging from 10 to 24,000 Hz. To generate  
662 these noises, recordings were performed in the colony room where a large group of guinea pigs were  
663 housed (30-40; 2-4 animals/cage). Several 4-seconds of audio recordings were added up to generate  
664 the "chorus noise", which power spectrum was computed using the Fourier transform. This spectrum  
665 was then used to shape the spectrum of a white Gaussian noise. The resulting vocalization-shaped  
666 stationary noise therefore matched the "chorus-noise" audio spectrum, which explains why some fre-  
667 quency bands were over-represented in the vocalization-shaped stationary noise. Figures 1b et 1c dis-  
668 play the spectrograms of the four whistles in the vocalization-shaped stationary noise (1b) and in the  
669 chorus noise (1c) with a SNR of +10 dB SPL, 0 dB SPL, -10 dB SPL. The last spectrograms of these  
670 two figures represent the noises only.

## 671 **Experimental protocol**

672 As inserting an array of 16 electrodes in a brain structure almost systematically induces a deformation  
673 of this structure, a 30-minutes recovering time lapse was allowed for the structure to return to its ini-  
674 tial shape, then the array was slowly lowered. Tests based on measures of time-frequency response  
675 profiles (TFRPs) were used to assess the quality of our recordings and to adjust electrodes' depth. For  
676 auditory cortex recordings (A1 and VRB), the recording depth was 500-1000  $\mu\text{m}$ , which corresponds  
677 to layer III and the upper part of layer IV according to Wallace and Palmer (2008). For thalamic re-  
678 cordings, the NeuroNexus probe was lowered about 7mm below pia before the first responses to pure  
679 tones were detected.

680 When a clear frequency tuning was obtained for at least 10 of the 16 electrodes, the stability of the  
681 tuning was assessed: we required that the recorded neurons displayed at least three successive similar  
682 TFRPs (each lasting 6 minutes) before starting the protocol. When the stability was satisfactory, the  
683 protocol was started by presenting the acoustic stimuli in the following order: We first presented the  
684 four whistles at 75 dB SPL in their natural versions (in quiet), followed by their masked versions pre-  
685 sented against the chorus and the vocalization-shaped stationary noise at 65, 75 and 85 dB SPL. Thus,  
686 the level of the original vocalizations was kept constant (75 dB SPL), and the noise level was in-  
687 creased (65, 75 and 85 dB SPL). In all cases, each vocalization was repeated 20 times. Presentation of  
688 this entire stimulus set lasted 45 minutes. The protocol was re-started either after moving the electrode  
689 arrays on the cortical map or after lowering the electrode at least by 300  $\mu\text{m}$  for subcortical structures.

## 690 **Data analysis**

### 691 **Quantification of responses to pure tones**

692 The TFRP were obtained by constructing post-stimulus time histograms for each frequency with 1 ms  
693 time bins. The firing rate evoked by each frequency was quantified by summing all the action poten-  
694 tials from the tone onset up to 100 ms after this onset. Thus, TFRP were matrices of 100 bins in ab-  
695 scissa (time) multiplied by 129 bins in ordinate (frequency). All TFRPs were smoothed with a uni-  
696 form 5x5 bin window.

697 For each TFRP, the Best Frequency (BF) was defined as the frequency at which the highest firing rate  
698 was recorded. Peaks of significant response were automatically identified using the following proce-  
699 dure: A positive peak in the TFRP was defined as a contour of firing rate above the average level of  
700 the baseline activity plus six times the standard deviation of the baseline activity. Recordings without  
701 significant peak of responses or with inhibitory responses were excluded from the data analyses.

### 702 **Quantification of responses evoked by vocalizations**

703 The responses to vocalizations were quantified using two parameters: (i) The firing rate of the evoked  
704 response, which corresponds to the total number of action potentials occurring during the presentation  
705 of the stimulus minus spontaneous activity; (ii) the trial-to-trial temporal reliability coefficient (Cor-  
706 rCoef) which quantifies the trial-to-trial reliability of the response over the 20 repetitions of the same  
707 stimulus. This index was computed for each vocalization: it corresponds to the normalized covariance  
708 between each pair of spike trains recorded at presentation of this vocalization and was calculated as  
709 follows:

$$710 \text{CorrCoef} = \frac{1}{N(N-1)} \sum_{i=1}^{N-1} \sum_{j=i+1}^N \frac{\sigma_{x_i x_j}}{\sigma_{x_i} \sigma_{x_j}}$$

711 where N is the number of trials and  $\sigma_{x_i x_j}$  is the normalized covariance at zero lag between spike trains  
712  $x_i$  and  $x_j$  where i and j are the trial numbers. Spike trains  $x_i$  and  $x_j$  were previously convolved with a  
713 10-ms width Gaussian window. Based upon computer simulations, we have previously shown that  
714 this CorrCoef index is not a function of the neurons' firing rate (Gaucher et al., 2013a).

715 We have computed the CorrCoef index with a Gaussian window ranging from 1 to 50 ms to determine  
716 if the selection of a particular value for the Gaussian window influences the difference in CorrCoef  
717 mean values obtained in the different auditory structures. Based upon the responses to the original  
718 vocalizations, we observed that the relative ranking between auditory structures remained unchanged  
719 whatever the size of the Gaussian window was. Therefore, we kept the value of 10 ms for the Gaussi-  
720 an window as it was used in several previous studies (Aushana et al., 2018; Gaucher and Edeline,  
721 2015; Gaucher et al., 2013a; Huetz et al., 2009).

722

### 723 ***Quantification of mutual information from the responses to vocalizations***

724 The method developed by Schnupp and colleagues (2006) was used to quantify the amount of infor-  
725 mation (Shannon, 1948) contained in the responses to original vocalizations. This method allows  
726 quantifying how well the vocalization's identity can be inferred from neuronal responses. Here, "neu-  
727 ronal responses" refer either to (i) the spike trains obtained from a small group of neurons below one  
728 electrode (for the computation of the individual Mutual Information,  $MI_{\text{Individual}}$ ). As this method is  
729 exhaustively described in Schnupp and colleagues (2006) and in Gaucher and colleagues (2013a), we  
730 only present below the main principles.

731 The method relies on a pattern-recognition algorithm that is designed to "guess which stimulus  
732 evoked a particular response pattern" (Schnupp et al., 2006) by going through the following steps:  
733 From all the responses of a cortical site to the different stimuli, a single response (test pattern) is ex-  
734 tracted and represented as a PSTH with a given bin size (8-ms bin size was considered as in Souffé  
735 and colleagues where we showed that the optimal bin size was 8 ms for all structures). Then, a mean  
736 response pattern is computed from the remaining responses (training set) for each stimulus class. The  
737 test pattern is then assigned to the stimulus class of the closest mean response pattern. This operation  
738 is repeated for all the responses, generating a confusion matrix where each response is assigned to a  
739 given stimulus class. From this confusion matrix, the Mutual Information (MI) is given by Shannon's  
740 formula:

$$741 \quad MI = \sum_{x,y} p(x,y) \times \log_2 \left( \frac{p(x,y)}{p(x) \times p(y)} \right)$$

742 where  $x$  and  $y$  are the rows and columns of the confusion matrix, or in other words, the values taken  
743 by the random variables "presented stimulus class" and "assigned stimulus class".

744 In our case, we used responses to the 4 whistles and selected the first 280 ms of these responses to  
745 work on spike trains of exactly the same duration (the shortest whistle being 280 ms long). In a sce-  
746 nario where the responses do not carry information, the assignments of each response to a mean re-  
747 sponse pattern is equivalent to chance level (here 0.25 because we used 4 different stimuli and each  
748 stimulus was presented the same number of times) and the MI would be close to zero. In the opposite  
749 case, when responses are very different between stimulus classes and very similar within a stimulus  
750 class, the confusion matrix would be diagonal and the mutual information would tend to  $\log_2(4) = 2$   
751 bits.

752 The MI estimates are subject to non-negligible positive sampling biases. Therefore, as in Schnupp and  
753 colleagues (2006), we estimated the expected size of this bias by calculating MI values for "shuffled"  
754 data, in which the response patterns were randomly reassigned to stimulus classes. The shuffling was  
755 repeated 100 times, resulting in 100 MI estimates of the bias ( $MI_{\text{bias}}$ ). These  $MI_{\text{bias}}$  estimates are then  
756 used as estimators for the computation of the statistical significance of the MI estimate for the real

757 (unshuffled) datasets: the real estimate is considered as significant if its value is statistically different  
 758 from the distribution of  $MI_{\text{bias}}$  shuffled estimates. Significant MI estimates were computed for MI cal-  
 759 culated from neuronal responses under one electrode.

### 760 **Quantification of the Extraction Index.**

761 To evaluate the influence of noise upon neural representation of vocalizations, we quantified the  
 762 amount of vocalization encoded by neurons at a particular SNR level by calculating an extraction in-  
 763 dex (EI) adapted from a similar study in songbirds (Schneider and Woolley 2013). This metric is  
 764 based on the repetition-averaged peristimulus time histogram (PSTH) of neural response with a time  
 765 bin of 4 ms. Different window bins of 1, 2, 4, 8, 16, and 32 ms were also evaluated, which yielded  
 766 qualitatively similar results. In this manuscript, we only report results based on 4 ms time bins. Only  
 767 the PSTH during the evoked activity is taken into account in this analysis.

768 EI was computed as follows:

$$EI = \frac{D_{n-snr} - D_{v-snr}}{D_{n-snr} + D_{v-snr}}$$

$$D_{n-snr} = 1 - \frac{\vec{P}_n \cdot \vec{P}_{snr}}{\|\vec{P}_n\| \|\vec{P}_{snr}\|}, \quad D_{v-snr} = 1 - \frac{\vec{P}_v \cdot \vec{P}_{snr}}{\|\vec{P}_v\| \|\vec{P}_{snr}\|}$$

772 where  $D_{n-snr}$  is the distance between PSTH  $\vec{P}_n$  of noise and PSTH  $\vec{P}_{snr}$  of vocalization at a particular  
 773 SNR, whereas  $D_{v-snr}$  is the distance between PSTH  $\vec{P}_v$  of pure vocalization and PSTH  $\vec{P}_{snr}$  of vocaliza-  
 774 tion at a particular SNR. EI is bounded between -1 and 1: a positive value indicates that the neural  
 775 response to noisy vocalization is more vocalization-like, and a negative value implies that the neural  
 776 response is more noise-like. The EI profile for each recording was determined by computing EI at  
 777 every SNR level. The normalized inner product was used to compute distance between  $\vec{P}_n$  or  $\vec{P}_v$  and  
 778  $\vec{P}_{snr}$ , as shown in equation above.

779 To probe the response patterns of each neuron, we further implemented an exploratory analysis based  
 780 on the calculated EI profiles as in Ni and colleagues (2017). By applying k-means clustering on the  
 781 blended EI profiles from both noise conditions separately, we obtained subgroups of EI profiles,  
 782 which divided the neuronal population into clusters according to the similarity of their EI profiles.  
 783 Similarity was quantified by Euclidean distance. The number of clusters was determined by the mean-  
 784 squared error (MSE) of clustering, as in equation below,

$$MSE = \frac{1}{N} \sum_{i=1}^N (\overline{EIP}_{cluster-i} - EIP_i)^2$$

785

786 where  $N$  is the number of neurons,  $EIP_i$  is the EI profile of a neuron, and  $EIP_{\text{cluster-}i}$  is the mean EI  
787 profile of the cluster into which this neuron is categorized.

788 To determine a significance level for the Extraction Index of each neuron, we generated 100 false ran-  
789 dom spike trains which follow a Poisson law based on the firing rate values obtained for each stimulus  
790 (original and noisy vocalizations). For a given SNR and recording, we computed based on these false  
791 spike trains, 100  $EI_{\text{Surrogate}}$  values and fixed a significance level corresponding to the mean plus two  
792 standard deviations. Using this criterion, we selected only the recordings with at least one of the six EI  
793 values significantly higher than the  $EI_{\text{Surrogate}}$ .

794

#### 795 *Bootstrap procedure*

796 To estimate the variability of the EI index generated in assigning each recording to a particular cate-  
797 gory in particular noise, we used a bootstrap strategy for all the recordings, separately for the station-  
798 ary and the chorus noise. Even in anesthetized animals, auditory cortex responses can show some var-  
799 iability. We suspected that in a given type of noise, a recording could change category because of the  
800 response variability and/or because the border between two clusters was very close, independently to  
801 the change in noise type.

802 From the 20 trials obtained for each stimulus during the experiment, we resampled randomly 20 trials  
803 (allowing repetitions) keeping the total number of trials the same as in the experimental data. For each  
804 resampled group of 20 trials, we recalculated both the PSTHs and the Extraction Index at each SNR  
805 then the K-means algorithm was used to define five clusters as in the experimental data. For each re-  
806 cording, this procedure was performed 100 times. Then, we reallocated each resampled data in the  
807 closest cluster compared to the original centroids of the experimental data to measure the percentage  
808 of changed categories relative to the original clustering.

#### 809 **Statistics**

810 To assess the significance of the multiple comparisons (masking noise conditions: three levels; audito-  
811 ry structure: five levels), we used an analysis of variance (ANOVA) for multiple factors to analyze the  
812 whole data set. Post-hoc pair-wise tests were performed between the original condition and the noisy  
813 conditions. They were corrected for multiple comparisons using Bonferroni corrections and were con-  
814 sidered as significant if their p-value was below 0.05. All data are presented as mean values  $\pm$  stand-  
815 ard error (s.e.m.).



816 **Acknowledgments**

817

818 CL and JME were supported by grants from the French Agence Nationale de la Recherche (ANR)  
819 (ANR-14-CE30-0019-01). CL was also supported by grants ANR-11-0001-02 PSL and ANR-10-  
820 LABX-0087. SS was supported by the Fondation pour la Recherche Médicale (FRM) grant number  
821 ECO20160736099 and by the Entendre Foundation. We thank Nihaad Paraouty for training us to  
822 cochlear-nucleus surgery and Jennifer Linden for insightful comments on a previous version of this  
823 article. We also wish to thank Céline Dubois, Mélanie Dumont and Aurélie Bonilla, for taking care of  
824 the guinea-pig colony.

825 **Competing Interests statement**

826

827 The authors declare no competing financial interests.

828

829

830

831  
832  
833  
834  
835  
836  
837  
838  
839  
840  
841  
842  
843  
844  
845  
846  
847  
848  
849  
850  
851  
852  
853  
854  
855  
856  
857  
858  
859  
860  
861  
862  
863  
864  
865  
866  
867  
868  
869  
870  
871  
872  
873  
874  
875  
876  
877  
878  
879  
880  
881  
882  
883

## References

- Anderson, L. A., Wallace, M. N. & Palmer, A. R. Identification of subdivisions in the medial geniculate body of the guinea pig. *Hearing Research* **228**, 156–167 (2007).
- Asari, H., Pearlmutter, B. A. & Zador, A. M. Sparse representations for the cocktail party problem. *J. Neurosci.* **26**, 7477–7490 (2006).
- Ascoli GA, Alonso-Nanclares L, et al. Petilla terminology: nomenclature of features of GABAergic interneurons of the cerebral cortex. *Nat Rev Neurosci.* 9(7):557-568. doi:10.1038/nrn2402 (2008).
- Aushana, Y., Souffi, S., Edeline, J.-M., Lorenzi, C. & Huetz, C. Robust Neuronal Discrimination in Primary Auditory Cortex Despite Degradations of Spectro-temporal Acoustic Details: Comparison Between Guinea Pigs with Normal Hearing and Mild Age-Related Hearing Loss. *J. Assoc. Res. Otolaryngol.* **19**, 163–180 (2018).
- Bajo, V. M., Nodal, F. R., Moore, D. R. & King, A. J. The descending corticocollicular pathway mediates learning-induced auditory plasticity. *Nat Neurosci* **13**, 253–260 (2010).
- Beetz, M. J., García-Rosales, F., Kössl, M. & Hechavarría, J. C. Robustness of cortical and subcortical processing in the presence of natural masking sounds. *Sci Rep* **8**, 6863 (2018).
- Cant NB, Benson CG. Parallel auditory pathways: projection patterns of the different neuronal populations in the dorsal and ventral cochlear nuclei. *Brain Res Bull.* 60(5-6):457-474. doi:10.1016/s0361-9230(03)00050-9 (2003).
- Cherry, E.C. Some experiments on the recognition of speech, with one and with two Ears. *J. Acoust. Soc. Am.* **25**, 975–979 (1953)
- Concina, G., Renna, A., Grosso, A. & Sacchetti, B. The auditory cortex and the emotional valence of sounds. *Neurosci Biobehav Rev* **98**, 256–264 (2019).
- Dean, I., Harper, N. S. & McAlpine, D. Neural population coding of sound level adapts to stimulus statistics. *Nat. Neurosci.* **8**, 1684–1689 (2005).
- Dean, I., Robinson, B. L., Harper, N. S. & McAlpine, D. Rapid neural adaptation to sound level statistics. *J. Neurosci.* **28**, 6430–6438 (2008).
- DeFelipe J, López-Cruz PL, Benavides-Piccione R, et al. New insights into the classification and nomenclature of cortical GABAergic interneurons. *Nat Rev Neurosci.* 14(3):202-216. doi:10.1038/nrn3444 (2013).
- Deneux, T. *et al.* Context-dependent signaling of coincident auditory and visual events in primary visual cortex. *Elife* **8**, (2019).
- Edeline J-M, Manunta Y, Nodal F & Bajo V. Do auditory responses recorded from awake animals reflect the anatomical parcellation of the auditory thalamus? *Hearing Research*, 131, 135-152, (1999).
- Fettiplace, R. & Ricci, A. J. Adaptation in auditory hair cells. *Curr. Opin. Neurobiol.* **13**, 446–451 (2003).
- Franke F, Quian Quiroga R, Hierlemann A, Obermayer K. (2015) Bayes optimal template matching for spike sorting - combining fisher discriminant analysis with optimal filtering. *J Comput Neurosci.* 38(3):439-59.
- Gaucher, Q. & Edeline, J.-M. Stimulus-specific effects of noradrenaline in auditory cortex: implications for the discrimination of communication sounds. *J. Physiol. (Lond.)* **593**, 1003–1020 (2015).
- Gaucher, Q., Edeline, J.-M. & Gourévitch, B. How different are the local field potentials and spiking activities? Insights from multi-electrodes arrays. *J. Physiol. Paris* **106**, 93–103 (2012).
- Gaucher, Q., Huetz, C., Gourévitch, B. & Edeline, J.-M. Cortical inhibition reduces information redundancy at presentation of communication sounds in the primary auditory cortex. *J. Neurosci.* **33**, 10713–10728 (2013a).
- Gerhardt, H. C. & Klump, G. M. Masking of acoustic signals by the chorus background noise in the green tree frog: A limitation on mate choice. *Animal Behaviour* **36**, 1247–1249 (1988).
- Gourévitch, B. & Edeline, J.-M. Age-related changes in the guinea pig auditory cortex: relationship with brainstem changes and comparison with tone-induced hearing loss. *Eur. J. Neurosci.* **34**, 1953–1965 (2011).
- Gourévitch, B., Doisy, T., Avillac, M. & Edeline, J.-M. Follow-up of latency and threshold shifts of auditory brainstem responses after single and interrupted acoustic trauma in guinea pig. *Brain Res.* **1304**, 66–79 (2009).
- Grimsley, J. M. S., Shanbhag, S. J., Palmer, A. R. & Wallace, M. N. Processing of Communication Calls in Guinea Pig Auditory Cortex. *PLoS ONE* **7**, e51646 (2012).
- Hromádka, T., DeWeese, M. R. & Zador, A. M. Sparse Representation of Sounds in the Unanesthetized Auditory Cortex. *PLoS Biol* **6**, e16 (2008).
- Huang, Y., Matysiak, A., Heil, P., König, R. & Brosch, M. Persistent neural activity in auditory cortex is related to auditory working memory in humans and nonhuman primates. *Elife* **5**, (2016).
- Huetz, C., Philibert, B. & Edeline, J.-M. A spike-timing code for discriminating conspecific vocalizations in the thalamocortical system of anesthetized and awake guinea pigs. *J. Neurosci.* **29**, 334–350 (2009).

- 884 Hulse, S.H., MacDougall-Shackleton, S.A. & Wisniewski, A.B. Auditory scene analysis by songbirds: stream segregation  
885 of birdsong by European starlings (*Sturnus vulgaris*). *J. Comp. Psychol.* **111**, 3–13 (1997).
- 886 Khalighinejad, B., Herrero, J. L., Mehta, A. D. & Mesgarani, N. Adaptation of the human auditory cortex to changing  
887 background noise. *Nat Commun* **10**, 2509 (2019).
- 888 Kuenzel T. Modulatory influences on time-coding neurons in the ventral cochlear nucleus. *Hear Res.* 2019;384:107824.  
889 doi:10.1016/j.heares.2019.107824
- 890 Las, L., Stern, E. A. & Nelken, I. Representation of tone in fluctuating maskers in the ascending auditory system. *J. Neu-*  
891 *rosci.* **25**, 1503–1513 (2005).
- 892 Lesica, N. A. & Grothe, B. Efficient Temporal Processing of Naturalistic Sounds. *PLoS ONE* **3**, e1655 (2008).
- 893 Malmierca, M. S. & Ryugo, D. K. Descending Connections of Auditory Cortex to the Midbrain and Brain Stem. in *The*  
894 *Auditory Cortex* (eds. Winer, J. A. & Schreiner, C. E.) 189–208 (Springer US, 2011). doi:10.1007/978-1-4419-  
895 0074-6\_9
- 896 Mesgarani, N. & Chang, E. F. Selective cortical representation of attended speaker in multi-talker speech perception. *Na-*  
897 *ture* **485**, 233–236 (2012).
- 898 Mesgarani, N., David, S. V., Fritz, J. B. & Shamma, S. A. Mechanisms of noise robust representation of speech in primary  
899 auditory cortex. *Proceedings of the National Academy of Sciences* **111**, 6792–6797 (2014).
- 900 Moczulska, K. E. *et al.* Dynamics of dendritic spines in the mouse auditory cortex during memory formation and memory  
901 recall. *Proc. Natl. Acad. Sci. U.S.A.* **110**, 18315–18320 (2013).
- 902 Narayan, R. *et al.* Cortical interference effects in the cocktail party problem. *Nat Neurosci* **10**, 1601–1607 (2007).
- 903 Ni, R., Bender, D. A., Shانهchi, A. M., Gamble, J. R. & Barbour, D. L. Contextual effects of noise on vocalization encod-  
904 ing in primary auditory cortex. *Journal of Neurophysiology* **117**, 713–727 (2017).
- 905 Occelli, F., Suied, C., Pressnitzer, D., Edeline, J.-M. & Gourévitch, B. A Neural Substrate for Rapid Timbre Recognition?  
906 Neural and Behavioral Discrimination of Very Brief Acoustic Vowels. *Cereb. Cortex* **26**, 2483–2496 (2016).
- 907 Parouty, N., Stasiak, A., Lorenzi, C., Varnet, L. & Winter, I. M. Dual Coding of Frequency Modulation in the Ventral  
908 Cochlear Nucleus. *J. Neurosci.* **38**, 4123–4137 (2018).
- 909 Pouzat C, Delescluse M, Viot P, Diebolt J. (2004) Improved spike-sorting by modeling firing statistics and burst-  
910 dependent spike amplitude attenuation: a Markov chain Monte Carlo approach. *J Neurophysiol.* 91(6):2910-28.
- 911 Quiroga RQ, Nadasdy Z, Ben-Shaul Y. (2004) Unsupervised spike detection and sorting with wavelets and superparamag-  
912 netic clustering. *Neural Comput.* 16(8):1661-87.
- 913 Rabinowitz, N. C., Willmore, B. D. B., King, A. J. & Schnupp, J. W. H. Constructing Noise-Invariant Representations of  
914 Sound in the Auditory Pathway. *PLoS Biol* **11**, e1001710 (2013).
- 915 Redies, H., Brandner, S. & Creutzfeldt, O. D. Anatomy of the auditory thalamocortical system of the guinea pig. *The*  
916 *Journal of Comparative Neurology* **282**, 489–511 (1989).
- 917 Robinson, B. L., Harper, N. S. & McAlpine, D. Meta-adaptation in the auditory midbrain under cortical influence. *Nat*  
918 *Commun* **7**, 13442 (2016).
- 919 Rutkowski, R. G., Shackleton, T. M., Schnupp, J. W. H., Wallace, M. N. & Palmer, A. R. Spectrotemporal Receptive Field  
920 Properties of Single Units in the Primary, Dorsocaudal and Ventrorostral Auditory Cortex of the Guinea Pig. *Audi-*  
921 *ology and Neurotology* **7**, 214–227 (2002).
- 922 Schneider, D. M. & Woolley, S. M. N. Sparse and Background-Invariant Coding of Vocalizations in Auditory Scenes.  
923 *Neuron* **79**, 141–152 (2013).
- 924 Schnupp, J. W. H., Hall, T. M., Kokelaar, R. F. & Ahmed, B. Plasticity of temporal pattern codes for vocalization stimuli  
925 in primary auditory cortex. *J. Neurosci.* **26**, 4785–4795 (2006).
- 926 Shannon, C. E. (1948) A mathematical theory of communication. *Bell Syst Tech J* **27**(3):379–423.
- 927 Souffi S, Lorenzi C, Varnet L, Huetz C Edeline JM (*in press*) Noise-sensitive but more precise subcortical representations  
928 co-exist with robust cortical encoding of natural vocalizations. *J. Neuroscience.*
- 929 Steinschneider, M., Liégeois-Chauvel, C. & Brugge, J. F. Auditory evoked potentials and their utility in the assessment of  
930 complex sound processing. *The auditory cortex* 535–559 (Springer, Boston, MA, 2011).
- 931 Wallace, M. N., Anderson, L. A. & Palmer, A. R. Phase-Locked Responses to Pure Tones in the Auditory Thalamus.  
932 *Journal of Neurophysiology* **98**, 1941–1952 (2007).
- 933 Wallace, M. N., Rutkowski, R. G. & Palmer, A. R. Identification and localisation of auditory areas in guinea pig cortex.  
934 *Experimental Brain Research* **132**, 445–456 (2000).
